# 1 **Title:** Reference data based insights expand 2 understanding of human metabolomes

3 Authors: Julia M. Gauglitz<sup>1,2</sup>, Wout Bittremieux<sup>1,2,3</sup>, Candace L. Williams<sup>4</sup>, Kelly C. Weldon<sup>1,2,5</sup>,  
4 Morgan Panitchpakdi<sup>1,2</sup>, Francesca Di Ottavio<sup>1</sup>, Christine M. Aceves<sup>1,2</sup>, Elizabeth Brown<sup>2,6</sup>, Nicole  
5 C. Sikora<sup>1,2</sup>, Alan K. Jarmusch<sup>1,2</sup>, Cameron Martino<sup>5,7,8</sup>, Anupriya Tripathi<sup>2,6,7</sup>, Erfan Sayyari<sup>5</sup>,  
6 Justin P. Shaffer<sup>7</sup>, Roxana Coras<sup>9</sup>, Fernando Vargas<sup>1,2,6</sup>, Lindsay DeRight Goldasich<sup>7</sup>, Tara  
7 Schwartz<sup>7</sup>, MacKenzie Bryant<sup>7</sup>, Gregory Humphrey<sup>7</sup>, Abigail J. Johnson<sup>10</sup>, Katharina Spengler<sup>1</sup>,  
8 Pedro Belda-Ferre<sup>7</sup>, Edgar Diaz<sup>7</sup>, Daniel McDonald<sup>7</sup>, Qiyun Zhu<sup>7</sup>, Dominic S. Nguyen<sup>7</sup>, Emmanuel  
9 O. Elijah<sup>1,2</sup>, Mingxun Wang<sup>1,2</sup>, Clarisse Marotz<sup>7</sup>, Kate E. Sprecher<sup>11,12</sup>, Daniela Vargas Robles<sup>13</sup>,  
10 Dana Withrow<sup>11</sup>, Gail Ackermann<sup>7</sup>, Lourdes Herrera<sup>14</sup>, Barry J. Bradford<sup>15</sup>, Lucas Maciel Mauriz  
11 Marques<sup>16</sup>, Juliano Geraldo Amaral<sup>17</sup>, Rodrigo Moreira Silva<sup>18</sup>, Flávio Protaso Veras<sup>16</sup>, Thiago  
12 Mattar Cunha<sup>16</sup>, Rene Donizeti Ribeiro Oliveira<sup>19</sup>, Paulo Louzada-Junior<sup>19</sup>, Robert H. Mills<sup>1,2,7,20</sup>,  
13 Douglas Galasko<sup>21</sup>, Parambir S. Dulai<sup>22</sup>, Curt Wittenberg<sup>23</sup>, David J. Gonzalez<sup>1,2,5,20</sup>, Robert  
14 Terkeltaub<sup>21</sup>, Megan M. Doty<sup>7,24</sup>, Jae H. Kim<sup>25</sup>, Kyung E. Rhee<sup>7</sup>, Julia Beauchamp-Walters<sup>26</sup>,  
15 Kenneth P. Wright Jr<sup>11</sup>, Maria Gloria Dominguez-Bello<sup>27</sup>, Mark Manary<sup>28</sup>, Michelli F. Oliveira<sup>29</sup>,  
16 Brigid S. Boland<sup>21</sup>, Norberto Peporine Lopes<sup>18</sup>, Monica Guma<sup>21</sup>, Austin D. Swafford<sup>5</sup>, Rachel J.  
17 Dutton<sup>6</sup>, Rob Knight<sup>5,7,30,31,\*</sup>, Pieter C. Dorrestein<sup>1,2,5,7,\*</sup>

18  
19

## 20 **Author Affiliations:**

21 1 Collaborative Mass Spectrometry Innovation Center; University of California San Diego; La  
22 Jolla, CA 92093; USA

23 2 Skaggs School of Pharmacy and Pharmaceutical Sciences; University of California San Diego;  
24 La Jolla CA 92093; USA

25 3 Department of Computer Science; University of Antwerp; 2020 Antwerpen; Belgium

26 4 Reproductive Sciences, Institute for Conservation Research; San Diego Zoo Global; Escondido,  
27 CA 92027; USA

28 5 Center for Microbiome Innovation, Joan and Irwin Jacobs School of Engineering; University of  
29 California San Diego; La Jolla, CA 92093; USA

30 6 Division of Biological Sciences; University of California San Diego; La Jolla, CA 92093; USA

31 7 Department of Pediatrics, School of Medicine; University of California San Diego; La Jolla, CA  
32 92093; USA

33 8 Bioinformatics and Systems Biology Program; University of California San Diego; La Jolla, CA  
34 92093; USA

35 9 Division of Rheumatology, Allergy & Immunology, Department of Medicine; University of  
36 California San Diego; La Jolla, CA 92093; USA

37 10 BioTechnology Institute; University of Minnesota; Saint Paul, MN 55108; USA

38 11 Department of Integrative Physiology; University of Colorado Boulder; Boulder, CO 80309;  
39 USA

40 12 Department of Population Health Sciences; University of Wisconsin-Madison; Madison, WI  
41 53726; USA

- 42 13 Servicio Autónomo Centro Amazónico de Investigación y Control de Enfermedades Tropicales  
43 Simón Bolívar; Puerto Ayacucho 7101, Amazonas; Venezuela
- 44 14 Department of Pediatrics; Wake Forest School of Medicine; Winston-Salem, NC 27101; USA
- 45 15 Department of Animal Science; Michigan State University; East Lansing, MI 48824; USA
- 46 16 Department of Pharmacology, School of Medicine of Ribeirão Preto, Center of Research in  
47 Inflammatory Diseases; University of São Paulo; Ribeirão Preto, CEP 14049-900 - SP; Brazil
- 48 17 Multidisciplinary Health Institute; Federal University of Bahia; 45029094, Vitória da Conquista  
49 - BA; Brazil
- 50 18 NPPNS, Department of Biomolecular Sciences, School of Pharmaceutical Sciences of  
51 Ribeirão Preto; University of São Paulo; Ribeirão Preto. CEP 14040-903 - SP; Brazil
- 52 19 Department of Internal Medicine, School of Medicine of Ribeirão Preto, Center of Research in  
53 Inflammatory Diseases; University of São Paulo; Ribeirão Preto, CEP 14049-900 - SP; Brazil
- 54 20 Department of Pharmacology; University of California San Diego; La Jolla, CA 92093; USA
- 55 21 Department of Neurosciences; University of California San Diego; La Jolla, CA 92093; USA
- 56 22 Division of Gastroenterology, Department of Medicine; University of California San Diego; La  
57 Jolla, CA 92093; USA
- 58 23 Department of Molecular Medicine; The Scripps Research Institute; La Jolla, CA 92037; USA
- 59 24 Division of Neonatology, Department of Pediatrics, Kapi'olani Medical Center for Women and  
60 Children; John A. Burns School of Medicine; Honolulu, Hawaii 96813; USA
- 61 25 Division of Neonatology, Perinatal Institute, Department of Pediatrics, Cincinnati Children's  
62 Hospital Medical Center; University of Cincinnati College of Medicine; Cincinnati, Ohio 45229;  
63 USA
- 64 26 Division of Pediatric Hospital Medicine, School of Medicine; University of California San Diego;  
65 La Jolla, CA 92093; USA
- 66 27 Department of Biochemistry and Microbiology, School of Environmental and Biological  
67 Sciences; Rutgers, The State University of New Jersey; New Brunswick, NJ 08901; USA
- 68 28 Department of Pediatrics; Washington University; St. Louis, MO 63110; USA
- 69 29 Department of Medicine; University of California San Diego; La Jolla, CA 92093; USA
- 70 30 Department of Computer Science and Engineering; University of California San Diego; La  
71 Jolla, CA 92093; USA
- 72 31 Department of Bioengineering; University of California San Diego; La Jolla, CA 92093; USA  
73

## 74 Summary

75 The human metabolome has remained largely unknown, with most studies annotating ~10% of  
76 features. In nucleic acid sequencing, annotating transcripts by source has proven essential for  
77 understanding gene function. Here we generalize this concept to stool, plasma, urine and other  
78 human metabolomes, discovering that food-based annotations increase the interpreted fraction  
79 of molecular features 7-fold, providing a general framework for expanding the interpretability of  
80 human metabolomic “dark matter.”  
81  
82

## 83 Introduction

84 In 2016, typical MS/MS-based untargeted metabolomics studies annotated only ~2% of  
85 molecules based on matches against spectral libraries, leaving the rest of the sample as  
86 metabolomic “dark matter.” The capture of community knowledge, accumulating public reference  
87 MS/MS spectra over the past four years, has increased this baseline ~2.5-fold within the global  
88 natural product social molecular networking (GNPS) infrastructure (Wang et al., 2016). This  
89 growth has been even more dramatic for data from commonly-studied specimen types such as  
90 human stool and plasma: 10.1 +/- 4.4% of MS/MS features now match to a reference MS/MS  
91 spectrum [1% FDR (Scheubert et al., 2017), n = 30, average number of unique MS/MS spectra is  
92 12,889/dataset]. However, despite these advances, the vast majority of detectable spectra lack  
93 any annotation.

94 This situation for MS/MS spectra is in sharp contrast to the interpretability of  
95 uncharacterized portions of the human genome. For example, reference data sets for gene  
96 expression, such as expressed sequence tags (an early form of RNASeq), enable the sequencing  
97 of “dark matter,” as opposed to monitoring the expression of a single curated gene. Such methods  
98 have significantly improved interpretation by annotating genes not directly by function, but rather  
99 by source (developmental stage, tissue location, organism-level, phenotype, etc.) (Bono, 2020;  
100 Ono et al., 2017). Interpretation based on source has been very important for metagenomics and  
101 metatranscriptomics, increasing our understanding of the structure and function of complex  
102 communities by leveraging matches between genes or transcripts of known and unknown origin  
103 via publicly available databases.

104 Annotation of chemicals, based on their source within publicly available complex reference  
105 samples that use controlled metadata vocabularies, has not been applied to metabolomics for  
106 several reasons. First, standards for annotation of molecules that are used to create spectral  
107 libraries have been based on availability of individual pure, typically commercially available,  
108 standards, and structural considerations such as presence of specific moieties. Many molecules  
109 are observed as multiple different ion forms, such as adducts, in-source fragments, and  
110 multimers. Current spectral libraries do not contain all possible ion forms of those molecules, and  
111 typically only the protonated form (Schmid et al., 2020; Vinaixa et al., 2016), because reference  
112 standards that run in a highly purified state that biases towards detection extraction of only specific  
113 data on specific ion forms. These forms are often different from the ions associated with the same  
114 molecule present in an extract from a biological matrix (e.g. proton vs sodium or even multiple  
115 sodium and potassium adducts), which then cannot be matched because the relevant spectra are  
116 not in the database. Second, on average, 5–10% of untargeted metabolomics data can be  
117 annotated from spectral libraries: the remaining 90+% are unassignable “dark matter” in  
118 metabolomics, especially when obtained from complex matrices such as human samples. Third,  
119 large databases of untargeted metabolomics data with consistently annotated provenance with  
120 controlled vocabularies have been neither available nor possible to effectively reuse. We recently  
121 addressed this latter problem via GNPS (Wang et al., 2016), ReDU (Jarmusch et al., 2019),  
122 importing data from MetaboLights into GNPS (Haug et al., 2020), with ReDU-compatible  
123 metadata conversion. Finally, the availability of robust scalable analysis infrastructures and  
124 algorithms, such as molecular networking, that enable the functional equivalent of reporting of

125 expressed sequence tag/RNASeq analysis, have only recently been introduced for mass  
126 spectrometry (Wang et al., 2016; Watrous et al., 2012).

127 To improve interpretation of otherwise unannotated data from untargeted mass  
128 spectrometry experiments, we leverage entire reference data sets with curated ontologies to  
129 complement existing spectral libraries of individual molecules. Due to lack of a better term we  
130 refer to this approach as interpretive metabolomics in this manuscript, and demonstrate its  
131 potential by leveraging the Global FoodOmics MS/MS spectral database, which we have made  
132 publicly available on MassIVE. This food reference data set will be key for enabling future insights  
133 into human health given the importance of diet and the urgent need to develop additional methods  
134 for empirical nutrient and diet assessments to understand acute and chronic human disease  
135 (Barabási et al., 2020). We demonstrate that interpretive metabolomics can address these types  
136 of knowledge gaps by showing that it not only massively expands the fraction of the data that can  
137 be interpreted, but that these new insights can lead to an improved understanding of the diets  
138 consumed upon co-analysis of human and food/beverage mass spectral data.

## 139 Results/Discussion

140 We conjectured that a major source of chemicals detected by metabolomics in human samples  
141 originates from foods and beverages. We created “Global FoodOmics”  
142 (<http://www.globalfoodomics.org>) in 2017, which now contains 3,579 food and beverage samples  
143 contributed by the community, as outlined in the methods, following in the footsteps of the  
144 American Gut and the Earth Microbiome Projects (McDonald et al., 2018; Thompson et al., 2017).  
145 The majority of samples were photographed, and a subset were subjected to 16S rRNA profiling  
146 (1,511 samples) to characterize the microbial composition, as well as providing information about  
147 mitochondria and chloroplast sequences matched by the same primers. Foods were manually  
148 classified according to the Earth Microbiome Project Ontology, the USDA Food Composition  
149 Database and a modification of the Food and Nutrient Database for Dietary Studies (Johnson et  
150 al., 2019; Thompson et al., 2017) (<https://ndb.nal.usda.gov/>) to allow cross-study compatibility. In  
151 total, we report 157 metadata categories that further include a six-level food ontology, as well as  
152 fermentation or organic status, land or aquatic origin, country of origin, etc. (**Table S1**). Foods  
153 and beverages in Global FoodOmics consist of a range of items, from simple ingredients to  
154 prepared meals, as well as animal feed.

155 A key benefit of interpretive metabolomics is that we consider all different ion forms  
156 encountered while collecting the Global FoodOmics dataset. The millions of MS/MS spectra in  
157 Global FoodOmics inherently include MS/MS spectra of different ion forms of both known and  
158 unknown molecules, and can, therefore, be matched in human biospecimens via direct matching  
159 of the MS/MS spectra or by more sophisticated approaches. The similar complexity of the  
160 reference and experimental data includes many chemicals that may have uncharacterized  
161 behavior, such as unexpected adducts or even multimers made up of different molecules. For the  
162 MS/MS spectra that do have annotations, it is possible to leverage GNPS tags to test whether the  
163 spectral matches make sense in the context of Global FoodOmics.

164 Within the GNPS environment, the community can also add tags to each reference  
165 spectrum in the spectral library using a controlled vocabulary, including multiple per structure. An  
166 InChIKey was included for 4586 of 5455 spectral matches against the reference libraries (~5%

167 annotation rate at 1% FDR), which yielded 1492 unique structures upon consideration of planar  
168 structures. There were 415/1492 structures that had lifestyle tags and “food consumption” is the  
169 most frequently reported with 357 entries (86%) (**Figure S1a**) (Bouslimani et al., 2016). Brief  
170 descriptive tags provide more detail about the annotation itself, and 1131/1492 structures were  
171 annotated with such tags. The most common descriptive tags were in order: “natural product”  
172 (790/1131), “food” (576/1131), “human”, “plant”, “natural product\_plant”, “plant\_angiospermae”,  
173 and “drug” (**Figure S1b**). Some of these associations with the category “human” may also be of  
174 food origin, such as arachidonoyl carnitine, which is currently only tagged as “human,” but may  
175 have a variety of animal-product based food sources. Similarly, the tag “drug” includes  
176 annotations such as the antimicrobial agent monensin, which is not tagged as a food molecule,  
177 but is consumed with animal products from animals raised using monensin as a growth promoter.  
178 Thus the Global FoodOmics reference data capture not only inherently food-derived molecules,  
179 but also food-sourced exogenous compounds such as preservatives, growth enhancing  
180 substances, antimicrobials, pesticides, and packaging materials. However, because the  
181 annotation rate remains low, most of the data remains unused despite the informative tags.

182 In addition to annotating molecules based on matches to library spectra, spectral matches  
183 to the food reference data can be obtained and visualized using MS/MS based molecular  
184 networking. When applying this method to both foods and biospecimens in an experimental sleep  
185 restriction and circadian misalignment study we observed connectivity of nodes within molecular  
186 families representing MS/MS spectra (**Figure 1a,b**). Using spectral libraries the tomatidine  
187 molecular family was shown to contain both annotated nodes (level 2 or 3, according to the 2007  
188 metabolomics standards initiative (Sumner et al., 2007) e.g, tomatidine, solasodine and  
189 sarsasapogenin (**Figure 1b**), as well as unannotated nodes, which are also observed with  
190 molecules occurring within Nightshade (Solanaceae) samples from the Global FoodOmics data  
191 set (**Figure 1c**). Sarsasapogenin (**Figure 1c, node 1**) is found in food as well as stool data while  
192 the +15.996 Da, the addition of the atom “O”, is only observed in stool data. However, numerous  
193 other molecular families (such as **Figure 1c, node 10**) contain no annotation, but do have spectral  
194 matches between plasma and foods — in this case features also observed in grape and fermented  
195 grape samples. In other cases, a plasma metabolite is annotated and connected to unannotated  
196 compounds found within the food reference samples (**Figure 1c, nodes 11-14**). These examples  
197 highlight how molecular networking can be used to propagate potential metabolism. How potential  
198 metabolism can be inferred with molecular networking is explained in (Quinn et al., 2017) and  
199 (Aron et al., 2020).

200 A critical aspect of being able to leverage the food reference data, akin to expressed  
201 sequence tags, is that the associated metadata can be retrieved and organized. We leverage the  
202 Global FoodOmics ontology to identify different food categories in which MS/MS spectra are  
203 observed. These food counts can be summarized for a dataset and then visualized as a flow chart  
204 (**Figure 1d**). Due to the controlled research diets of the participants of the sleep and circadian  
205 study in **Figure 1d**, we were able to report if a given food category was consumed during the  
206 study. Of the 15 categories observed at level 5 of the food ontology, 8 represented direct matches,  
207 3 represented fermented counterparts of consumed foods (such as yogurt and fermented grapes  
208 when milk and grapes were consumed), and 4 categories were not documented to be consumed,  
209 while coffee and tea were not provided to participants during this study. By and large, consistent  
210 with the lack of consumption of caffeinated beverages, evidence of coffee or tea consumption

211 was only observed in two individuals. In one individual, caffeine was only detected in the first 48  
 212 hrs, and in the other volunteer, caffeine was observed in a single time point in the later part of the  
 213 study (second to last time point). Spectral matches to caffeine were not detected in any of the  
 214 other participants. Thus, the empirically-recovered food ontology information from metabolomics  
 215 data demonstrates that these matches are consistent with the food that was consumed in this  
 216 study.  
 217

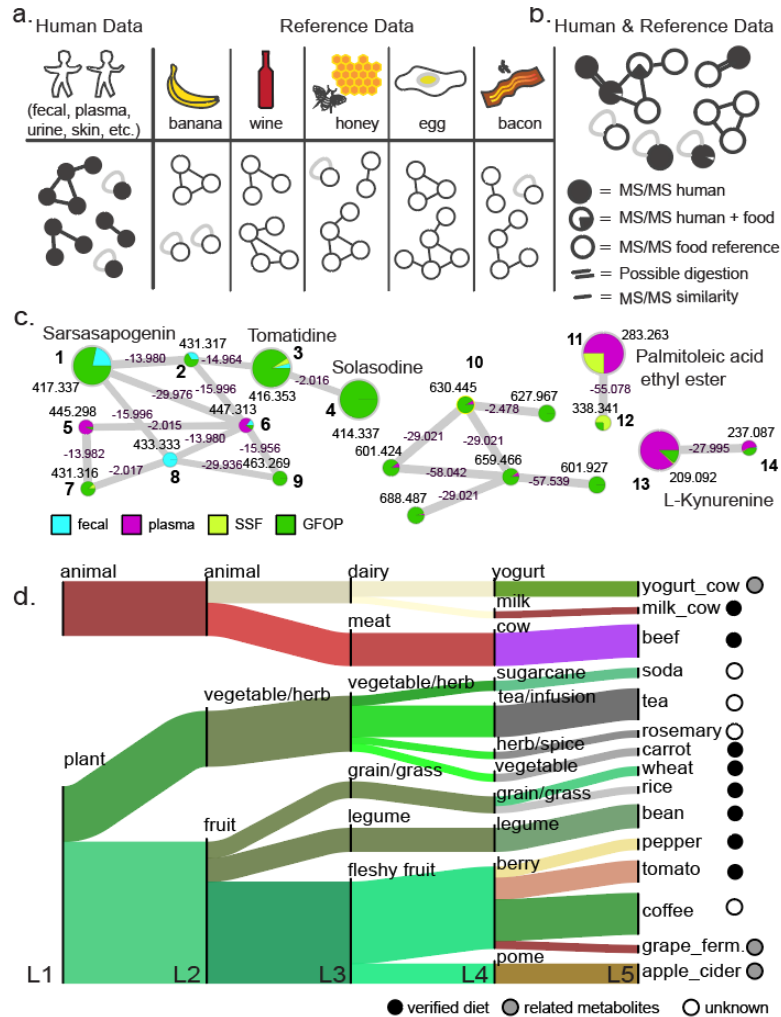

218  
 219 **Figure 1. The concept of interpretive metabolomics leveraging reference data sets.** a. A schematic  
 220 overview of human data and reference data (e.g. data from food items) as molecular families from  
 221 independent data sets that are used in b. b. A schematic representation when reference data is co-  
 222 networked with human metabolomics data. Each node represents a unique MS/MS spectrum. c.  
 223 Experimentally observed molecular families (sub-networks) generated from the co-analysis of stool (light  
 224 blue) and plasma (magenta) data from a sleep restriction and circadian misalignment study with the Global  
 225 FoodOmics reference dataset (green). Annotations are level 2/3 according to the 2007 metabolomics  
 226 standards initiative (Sumner et al., 2007). Nodes 1-9: Tomatidine molecular family. Molecular family 10:  
 227 a molecular family identified based on overlap of grape and fermented grape samples with plasma samples;  
 228 multiple nodes contain spectral matches, however there is no library annotation and would otherwise remain  
 229 completely uncharacterized. d. Summary of the spectra observed in plasma at each of the five food  
 230 ontology levels. As this cohort received controlled diets, food categories observed in plasma samples were

231 matched with the known foods consumed. Solid circles represent MS/MS matches to foods consumed  
232 during the study, while grey circles represent MS/MS matches to fermented versions of foods consumed,  
233 indicating possible byproducts of digestion. Open white circle indicates consumption was not recorded in  
234 this study.

235  
236 To illustrate the broad utility of the Global FoodOmics reference data in enhancing the  
237 information gained from untargeted metabolomics, we co-analyzed the Global FoodOmics  
238 dataset with 27 human datasets (**Table S2**; at 1% FDR spectral matching), with the inclusion of  
239 additional study specific foods (SSF) where applicable (**Figure 1a**). These datasets contained  
240 between 5 and 2123 samples, represented multiple different biofluids and tissues, and included  
241 both adult and pediatric subjects, in conditions ranging from extremely long lived, such as a  
242 centenarian-enriched population in the Cilento Blue Zone in Italy, to inflammatory bowel disease,  
243 the healthy young adults undergoing experimental sleep restriction and circadian misalignment  
244 highlighted in **Figure 1** (Sprecher et al. 2019), children with medical complexity, adults with  
245 Alzheimer's disease, and Covid-19 infections in Brazil (**Table S2**).

246 Spectral matching to food reference data, observed as overlaps between datasets from  
247 molecular networking, increased the interpretable fraction by 5.1 +/- 3.3 fold, even when  
248 compared to the library of all 150,633 public reference spectra that are used by the GNPS analysis  
249 infrastructure for annotation of public data which presently includes 29 spectral libraries, including  
250 from the three MassBanks (Japan, EU and North America) (Horai et al., 2010), HMDB (Wishart  
251 et al., 2018), ReSpect (Sawada et al., 2012), NIH natural product libraries (Huang et al., 2019),  
252 PNNL lipid library (Kyle et al., 2017), Bruker/Sumner, FDA libraries, Gates Malaria library, EMBL  
253 library, as well as many other GNPS contributed libraries  
254 (<https://gnps.ucsd.edu/ProteoSAFe/libraries.jsp>) and the commercial NIST17 library (CID portion  
255 only). Adding in additional information from molecular network connectivity, which can capture  
256 metabolized versions of molecules, the fold change of interpretable data increased further to 6.8  
257 +/- 3.5 fold (**Figure 2**). The Global FoodOmics reference samples significantly increased the  
258 interpretation of various human metabolome samples above the initial annotation rate by 26.8+/-  
259 3.3% for stool data ( $P = 2.8e-16$ , Games-Howell test), 27.5 +/- 5.2% for plasma data ( $P = 0.0040$ ,  
260 Games-Howell test) and 41 +/- 4.6% for other human data ( $P = 0.00020$ , Games-Howell test).  
261 Further inclusion of connected nodes, representing potential metabolism via molecular  
262 transformations, results in a total increase of 43.7 +/- 3.1% (fecal;  $P = 6.9e-10$ , Games-Howell  
263 test), 51.2 +/- 6.9% (plasma;  $P = 2.8e-06$ , Games-Howell test), and 58.0 +/- 4.2% (human other;  
264  $P = 1.4e-06$ , Games-Howell test) percent of MS/MS spectra that can now be leveraged as  
265 potentially a direct empirical readout of diet.

266 For 14 of the public datasets, food samples of the region or exact dietary items frequently  
267 or exclusively eaten by that particular population were also collected (study specific foods; SSF).  
268 SSF and Global FoodOmics reference samples were separately (SSF; GFOP) and jointly (SSF &  
269 GFOP) evaluated for changes to the interpretable fraction of MS/MS spectra (**Figure 2**). For  
270 example, adding SSF (n=38) alone increased the percent of interpreted spectra for the  
271 centenarian stool data from an initial 5.4% annotation rate against spectral libraries to 20.0%  
272 interpreted (**Figure 2a**) and 4.9% initial to 24.4% for plasma samples (**Figure 2b**), and adding  
273 Global FoodOmics further expanded this to 49.0% (55.0% in plasma). For the sleep restriction  
274 and circadian misalignment study highlighted in **Figure 1**, the interpreted fraction also increased  
275 from an initial 7.2% to 27.8% (n=197 food samples; 45 of which are pooled meal samples), with

276 a further increase to 46.3% when using the Global FoodOmics reference data set (7.8% to 38.9%  
 277 and with Global FoodOmics up to 54% for plasma). Overall, the inclusion of SSF significantly  
 278 contributed to the increase in dietary spectral matches in plasma (**Figure 2b**;  $P = 0.0028$ , Games-  
 279 Howell test). In addition, in some cohorts the interpreted spectral rate reaches almost 80% after  
 280 expansion with molecular networking (**Figure 2c**).

281 To further demonstrate that spectral matching using reference matching reflects dietary  
 282 components, we performed a crossover study to test whether a mismatched SSF inventory would  
 283 yield similar results to the increases observed across studies with SSF (e.g. centenarian foods  
 284 for the sleep and circadian study cohort). Crossover revealed that the reciprocal tests  
 285 interpretation rates were only a few percent (5–6%) in comparison to when the correct SSF were  
 286 used (15–30%) (**Figure 2d**).

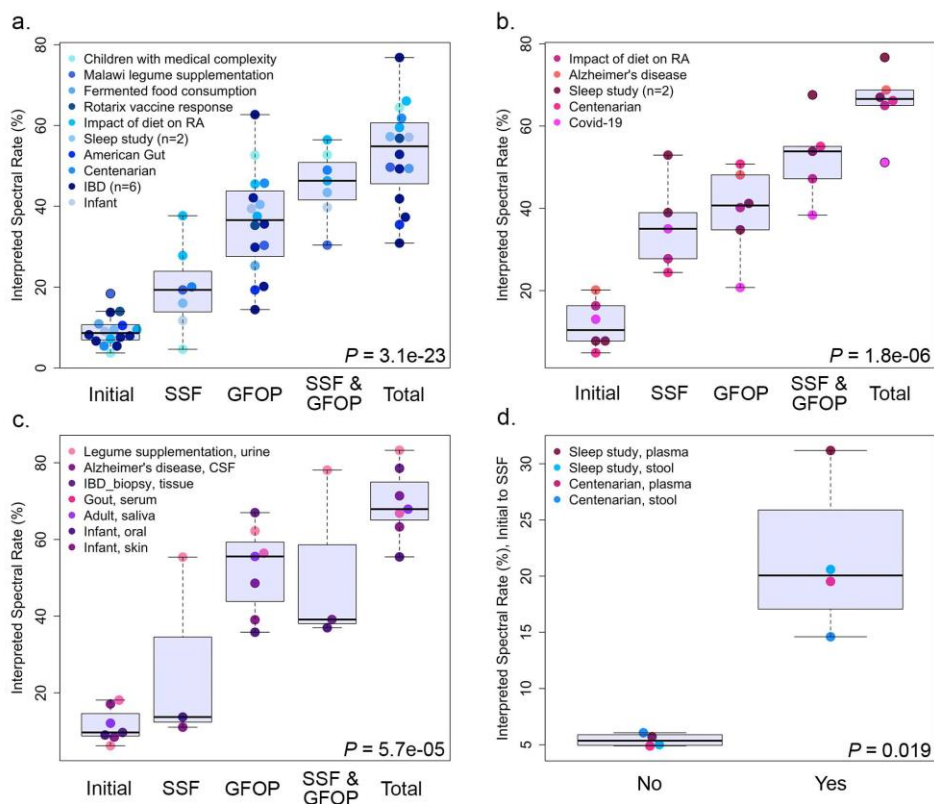

287  
 288 **Figure 2. Increases of MS/MS spectral match rates when using interpretive metabolomics at the**  
 289 **data set level.** Spectral match rates of molecular features due to library match, food reference data, and  
 290 molecular networking in **a.** stool data. Significant differences are determined by Welch's F-Test. Library  
 291 spectral matches (initial), spectral matches to study specific foods (SSF), spectral matches to Global  
 292 FoodOmics project (GFOP) data, both (SSF & GFOP), expansion with molecular networking (Total). **b.**  
 293 plasma data, and **c.** other human biospecimens. **d.** A crossover experiment between the centenarian data  
 294 from Italy and the sleep and circadian study from the US, for both fecal and plasma samples. Study specific  
 295 foods consumed by those individuals (yes) vs a different set of study specific foods (no), (Welch's *t*-test).  
 296

297 As the Global FoodOmics reference database expands with regionally-specific foods  
 298 through a continued community effort, the interpreted fraction will likely increase. For example,  
 299 when legume food data (15 files; SSF) similar to legumes supplemented in an infant malnutrition



300 study were included in addition to the Global FoodOmics data, the number of spectral counts for  
 301 legumes went from 105 to 2430 unique MS/MS spectra that matched, while other food categories  
 302 such as dairy and meats remained constant (level 3 food ontology; Legume supplementation,  
 303 urine). Regional specificity was also directly evident for plasma samples collected in Brazil for a  
 304 Covid-19 study, which displayed more spectral matches to a locally collected set of 60 Brazilian  
 305 food samples with ~35% increase than to the entire Global FoodOmics reference dataset, that is  
 306 dominated by US food, which only gave an ~20% increase in spectral matches (**Figure 2b**). Thus,  
 307 although there is some overlap among the data from different foods, and even overlap among  
 308 human-derived metabolites and the food data (e.g. many primary metabolites or those common  
 309 in vertebrates), a large proportion are sufficiently unique to reveal, at least in part, the dietary  
 310 composition in the study.

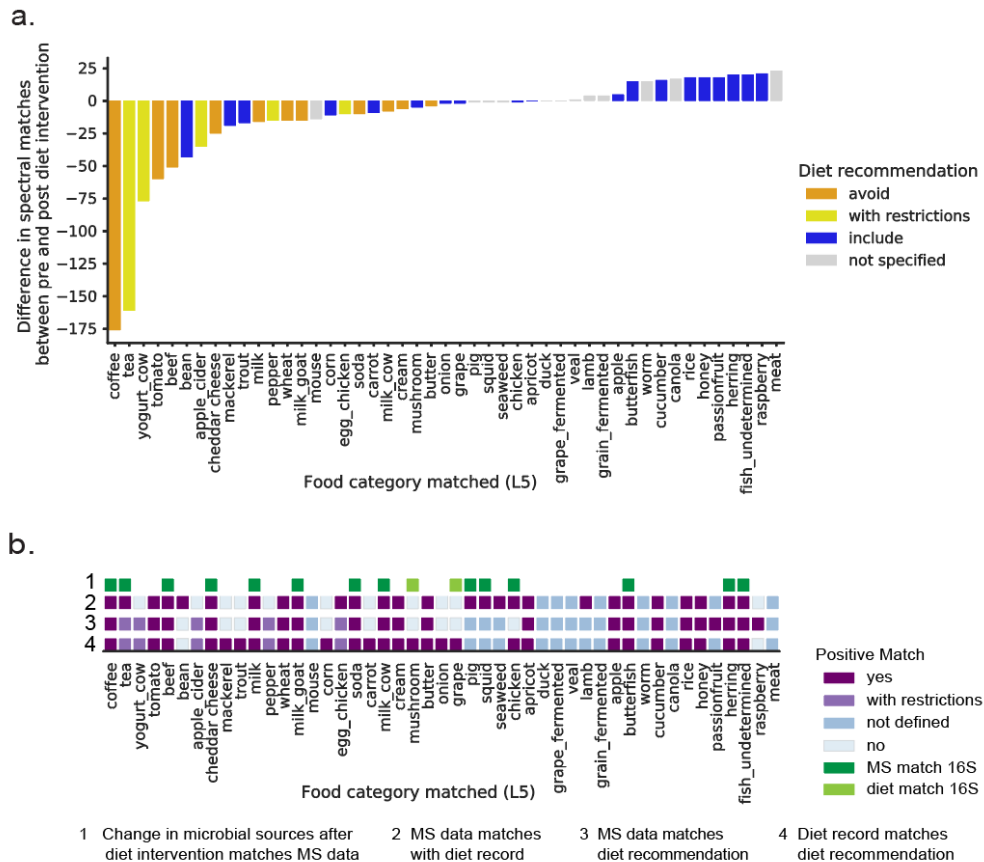

311 **Figure 3. Using interpretive metabolomics to assess dietary recommendations at the study level. a.**  
 312 Food ontologies of a rheumatoid arthritis cohort before and after a specific dietary recommendation of a  
 313 low inflammatory diet. Plasma data are used. Food categories indicated as 'with restrictions' encompass  
 314 foods where different types are encouraged and others discouraged (green vs. black tea) or foods that were  
 315 supposed to be minimized (such as limiting egg consumption to 2 eggs per week). Food categories  
 316 indicated as 'not specified' could not be matched to the suggested diet. **b.** Comparison of interpretive  
 317 metabolomics results in the recommended diet and self-reported diet intake. Diet diaries were tabulated as  
 318 consumption or no consumption of >200 food categories over the 28 days of the study and matched to the  
 319 MS food categories, as possible. Matches to 16S rRNA gene sequence data are based on Bayesian source  
 320 tracking proportions from the bacterial community, with food types as sources and rheumatoid arthritis fecal  
 321 samples as sinks. The increase or decrease in the proportion of food source contribution pre and post  
 322 dietary intervention (y-axis) is colored according to dietary recommendations.  
 323

324

325 To assess if interpretive metabolomics could be used to empirically establish adherence  
326 to dietary recommendations using MS/MS data, we analyzed a data set from rheumatoid arthritis  
327 patients (RA) asked to follow an anti-inflammatory diet (ITIS diet) (Bustamante et al., 2020). We  
328 compared the per sample extracted food counts with the recommended diet alteration as well as  
329 self-reported diet diary entries. The recommended diet included some foods to be avoided (such  
330 as coffee, refined sugars and milk), some foods to be restricted (minimize red meat and egg  
331 consumption) and some foods to be frequently consumed (such as fruits/vegetables, and plain  
332 unsweetened yogurt). In total, 47 foods and beverages were observed in this project with  
333 interpretive metabolomics (**Figure 3a**). By and large, most adhered to the recommended diet, as  
334 food counts of recommended foods increased, and those of foods to avoid decreased. Although  
335 there are instances when the mass spectrometry based observations did not match the  
336 recommended diet regime, the self-reported dietary records matched the empirically determined  
337 foods better than the recommended dietary information (**Figure 3b**). We further validated these  
338 matches using source tracking with 16S rRNA gene amplicon data collected on ~1500 samples  
339 of the Global FoodOmics foods, to predict food source contribution to the RA study stool samples.  
340 We observed a highly significant correlation in the proportion change of food sources predicted in  
341 the stool samples and metabolites in the plasma before and after dietary intervention (Pearson  
342  $r = 0.57$ ,  $p$ -value = 0.003; **Figure S2**). The empirically recovered food ontology information from  
343 interpretive metabolomics, in conjunction with validation with DNA sequence data, demonstrates  
344 the ability to recapitulate dietary readouts from human biospecimens and assess diet adherence.

345 Interpretive metabolomics comes with several caveats to consider. We are not yet able to  
346 capture a complete picture of the human diet: for example, in the RA study, the participant diet  
347 diaries contained foods not yet captured in the FoodOmics database, potentially leading to an  
348 underestimation of food types observed. Community expansion of the Global FoodOmics  
349 database with specific foods and food ingredients will ultimately eliminate this issue.

350 Another consideration is similar to what is observed with expressed sequence  
351 tags/RNASeq, where it is common to observe that there are multiple sample types, tissue  
352 locations or conditions that result in misinterpretation because the same sequence occurs in  
353 multiple locations. By analogy, a molecule could be produced by humans but also be part of  
354 different diet sources (i.e. cholesterol produced by the human body versus consumed). However,  
355 such matches still enable one to formulate a hypothesis that the observed MS/MS features from  
356 the human data might originate from the reference data as source, in this case food, especially  
357 when there are hundreds or thousands of signatures that point to specific foods or food groups  
358 that overlap.

359 As we saw in many of the above datasets, it is not atypical to observe small numbers of  
360 spectral matches to insects, rodents, fungi and worms within diet read-outs. Although data on  
361 fungi, tarantula, crickets, and black ants, meant for human consumption, are included, most of  
362 these samples that match human data sets are from a Global FoodOmics sampling effort at the  
363 San Diego Zoo. While there is likely some overlap with molecules from these less common foods  
364 to those that humans more commonly consume (e.g. certain acylcarnitines might be found in beef  
365 and mice), the FDA food contamination guidelines allow for insect, fungal, worm, rodent parts and  
366 fecal matter to be present in food in quantities that surprise many non-specialists (Center for Food  
367 Safety and Nutrition, 2019) For example, peanut butter is allowed to have 30 or more insect

368 fragments and one rodent hair per 100 grams, and apple butter is allowed to have “5 or more  
369 whole or equivalent insects (not counting mites, aphids, thrips, or scale insects) per 100 grams of  
370 apple butter.” As long as these dietary “additives” are added to the reference data set, they too  
371 will be observed. Thus, interpretive metabolomics can provide empirical support for dietary  
372 compliance in nutritional content, including in clinical studies, and capture information that would  
373 otherwise remain hidden.

## 374 Conclusion

375 Here we show that well-curated reference datasets can be leveraged to provide a deeper  
376 understanding of untargeted metabolomics. Adding food-based spectral matches improves our  
377 ability to interpret molecular features 2 to 14-fold, and further improves to 3 to 17-fold by  
378 incorporating connections from molecular networking, providing a deeper insight of the  
379 metabolomic “dark matter.” Our results indicate that a direct empirical readout of diet adherence  
380 is within our reach using interpretive metabolomics, by combining structural, source, and chemical  
381 similarity measures.

382 Although we demonstrated the power of interpretive metabolomics with food data as  
383 reference, any individual reference data set or combination of multiple data sets could be used in  
384 this fashion. We envision the broad application of such an approach. Generating databases for  
385 environmental allergens, medications, illegal substances, food ingredients and personal care  
386 products can inform within those research areas on potential exposures and food adulteration.  
387 Further, such investigations may also have far reaching impacts to understand commonalities  
388 that underlie different diseases. Over time, as metabolomics data repositories begin to control  
389 metadata vocabularies, most public data could be leveraged and reused as a reference data set  
390 on its own. This will significantly improve the interpretability of all metabolomics data, be it from  
391 environmental, animal, or human sources.

## 392 Acknowledgments

393 Funding sources: We thanks the CCF foundation #675191, U19 AG063744 01, R01AG061066,  
394 1 DP1 AT010885, P30 DK120515 Office of Naval Research MURI grant N00014-15-1-2809 and  
395 NIH/NCATS Colorado CTSA Grant UL1TR002535. This work was also supported in part by the  
396 Chancellor’s Initiative in the Microbiome and Microbial Sciences and by Illumina, Inc. through  
397 reagent donation in partnership with the Center for Microbiome Innovation at UC San Diego. We  
398 would like to thank Elaine Wolfe and Karenina Sanders for sample processing, and Jeff DeReus  
399 for data handling, processing and maintaining the computational infrastructure. JPS was  
400 supported by SD IRACDA (5K12GM068524-17), and in part by USDA-NIFA (2019-67013-29137)  
401 and the Einstein Institute GOLD project (R01MD011389). RC and MG were supported by Krupp  
402 Endowed Fund. RHM was supported through a UCSD training grant from the NIH/NIDDK  
403 Gastroenterology Training Program (T32 DK007202). The Brazilian National Council for Scientific  
404 and Technological Development (CNPq)-Brazil [245954/2012] to MFO. KS was supported by a  
405 PROMOS fund (DAAD). WB is a postdoctoral researcher of the Research Foundation – Flanders  
406 (FWO). We thank Ricardo da Silva for his feedback and early bioinformatics analysis for the  
407 Global FoodOmics project. We further acknowledge all the individuals that contributed samples

408 as well as companies and organizations that have donated samples: Townshend's Tea Company,  
409 BDK Kombucha, Oregonian Tonic, Squirrel & Crow, Venissimo cheese, Fermenter's Club San  
410 Diego, Good Neighbor Gardens, Sprouts Farmers Market, Ralphs, Whole Foods and SD Zoo and  
411 Safari Park. Specifically thank you to Austin Durant for coordinating sampling at Fermentation  
412 Festivals and the wonderful staff at SD Zoo Global for coordinating and helping with sample  
413 collection: Michele Gaffney, Edith Galindo, Katie Kerr, Andrea Fidgett, Jennifer Stuart, Debbie  
414 Tanciatco, and Lisa Pospychala.

## 415 Author Contributions

416 PCD, RK, RJD, and JMG conceptualized the idea.  
417 MWP, FDO, KCW, CMA, EB, KS, PCD, RJD, RK, NCS, ADS, GA, DM, NPL, and JMG collected  
418 FoodOmics samples and performed metadata curation.  
419 MWP, FDO, FV, CMA, EB, NCS, and JMG performed FoodOmics sample processing and MS  
420 data acquisition.  
421 AJJ, PBF, ED, QZ, DN, DM, JPS, and JMG curated Global FoodOmics metadata to match  
422 FNDDS.  
423 JBW, BSB, BJB, RC, MGDB, MD, EOE, DG, LH, JK, MM, CM, RK, KES, DVR, CW, KPW, MFO,  
424 RHM, DW, RT, JGA, PD, MG, DG, AKJ, BJB, RMS, KCW, ADS, FV, NPL, and JMG provided  
425 samples, comparative dataset, and/or detailed metadata.  
426 LMMM, TMC performed Covid-19 patient and/or food sample preparation and analysis.  
427 PLJ was the physician responsible for the Covid-19 patients (provided samples).  
428 RDRO was the physician responsible for collecting the plasma from Covid-19 patients (provided  
429 samples).  
430 FPV was responsible for tabulation of Covid-19 patient data and analysis of health components,  
431 and body dimensions.  
432 TS, MB, LDG, GH performed 16S sequencing and prep.  
433 CM, DM, JPS performed source tracking and/or 16S data analysis.  
434 MW supported GNPS computational infrastructure used in the study.  
435 CLW, WB, AKJ, ES, AT, NPL and JMG analyzed MS data.  
436 CLW, WB, AKJ, CM, and JMG generated figures.  
437 PCD, RK, RJD, ADS, and JMG supervised the work.  
438 PCD, RK, CLW, and JMG wrote the paper.  
439 All authors have contributed feedback and edits to the manuscript.

## 440 Declaration of Interests

441 BSB has a research grant from Prometheus Biosciences and has received consulting fees from  
442 Pfizer. PCD is on the scientific advisory board of Sirenas, Cybele Microbiome, Galileo and founder  
443 and scientific advisor of Ometa Labs LLC (with approval by UC San Diego). JHK is a consultant  
444 for Medela, Astarte Medical, Nutricia, and Fujifilm; he owns shares in Astarte Medical and  
445 Nicolette. MG has research grants from Pfizer and Novartis. PSD has received research support  
446 and/or consulting from Takeda, Pfizer, Abbvie, Janssen, Prometheus, Buhlmann, Polymedco.  
447 AJJ has received consulting fees from Abbott Nutrition and Corebiome. DG is a consultant for

448 Biogen, Fujirebio, vTv Therapeutics, Esai and Amprion and serves on a DSMB for Cognition  
449 Therapeutics. KPW reports during the conduct of the study receiving research support from  
450 SomaLogic, Inc., consulting fees from or served as a paid member of scientific advisory boards  
451 for the Sleep Disorders Research Advisory Board - National Heart, Lung and Blood Institute,  
452 CurAegis Technologies, Circadian Therapeutics, LTD. and Circadian Biotherapies Ltd. ADS and  
453 RK are directors at the Center for Microbiome Innovation at UC San Diego, which receives  
454 industry research funding for multiple microbiome initiatives, but no industry funding was provided  
455 for this project. MW is a co-founder of Ometa Labs LLC.

## 456 STAR Methods

### 457 Resource Availability

#### 458 Lead Contact

459 Further information and requests for resources should be directed to and will be fulfilled by the  
460 Lead Contact, Pieter Dorrestein ([pdorrestein@health.ucsd.edu](mailto:pdorrestein@health.ucsd.edu)).

#### 461 Materials Availability

462 This study did not generate new unique reagents.

### 463 Data and Code Availability

464 The code generated during this study is available on GitHub at  
465 <https://github.com/DorresteinLaboratory/GlobalFoodomics>.

466 Raw and processed 16S rRNA amplicon sequencing data is available at Qiita study  
467 #11442 and raw sequence data has been deposited at EBI accession ERP122648.

468 GNPS task ID of analysis used for tag generation: f1a1f3a61aca416a9b3687d72488da7f

469 The following files are available in addition to the Global FoodOmics mzXML files on  
470 massive.ucsd.edu under MSV000084900: metadata as a .txt; an image repository with between  
471 1 and 6 images per food; table of FDR-based parameters; raw food count data for RA study; full  
472 size PDF of sleep restriction and circadian misalignment study - GFOP3500 molecular network  
473 (excerpts found in Figure 1).

474 Metadata dictionary:

475 [https://docs.google.com/spreadsheets/d/1Ebn-](https://docs.google.com/spreadsheets/d/1Ebn-TgMWEkd_7KOW9TCRvHGPsE7dGjVCr7dq28pwbmM/edit#gid=727944641)  
476 [TgMWEkd\\_7KOW9TCRvHGPsE7dGjVCr7dq28pwbmM/edit#gid=727944641](https://docs.google.com/spreadsheets/d/1Ebn-TgMWEkd_7KOW9TCRvHGPsE7dGjVCr7dq28pwbmM/edit#gid=727944641)

477

478 The GNPS analyses used in this study can be accessed on-line at the following links:

- 479 • Sleep study (MSV000083759;  
480 <https://gnps.ucsd.edu/ProteoSAFe/status.jsp?task=e0bf255bcb2e492bb0be3be1a691b5fb>;  
481 <https://gnps.ucsd.edu/ProteoSAFe/status.jsp?task=6fe434761daf4f9da540cf1fd90b3985>;  
482 <https://gnps.ucsd.edu/ProteoSAFe/status.jsp?task=9a90bd12f51e453e968656e6458e0da4>)

- 483 • Centenarian (MSV000084591;  
484 <https://gnps.ucsd.edu/ProteoSAFe/status.jsp?task=8895b6e3445546c4a5bc3a726a920227>;
- 485 <https://gnps.ucsd.edu/ProteoSAFe/status.jsp?task=981c9a7d39f742bda296d52f856981e5>)
- 486 • Impact of diet on RA (MSV000084556;  
487 <https://gnps.ucsd.edu/ProteoSAFe/status.jsp?task=0794151fce2c4c18a7a0aa3a09140169>)
- 488 • LP Infant (MSV000083462; MSV000083463;  
489 <https://gnps.ucsd.edu/ProteoSAFe/status.jsp?task=a7b222466ef844e69cdbc9835d2f6c39>;
- 490 <https://gnps.ucsd.edu/ProteoSAFe/status.jsp?task=c756a9dfb5c34a2a8655f88114edf0a8>;
- 491 <https://gnps.ucsd.edu/ProteoSAFe/status.jsp?task=4a322e640bb644068030949267fb4ea9>)
- 492 • Children with Medical Complexity (MSV000084610;  
493 <https://gnps.ucsd.edu/ProteoSAFe/status.jsp?task=df24423835a341969342c2086b46275a>)
- 494 • American Gut (MSV000081981;  
495 <https://gnps.ucsd.edu/ProteoSAFe/status.jsp?task=4884483bcffe4f269819858c3fd4faef>)
- 496 • Fermented food consumption (MSV000081171;  
497 <https://gnps.ucsd.edu/ProteoSAFe/status.jsp?task=5cca39e0ebab4066a56e41ded48b4466>)
- 498 • Malawi legume supplement (MSV000081486;  
499 <https://gnps.ucsd.edu/ProteoSAFe/status.jsp?task=93ba727aa9234727a73ae7860b2af3ca>)
- 500 • Rotarix vaccine response (MSV000084218;  
501 <https://gnps.ucsd.edu/ProteoSAFe/status.jsp?task=08e9b9e048f04ac4b416e574a073e8e6>)
- 502 • IBD\_1 (MSV000082431;  
503 <https://gnps.ucsd.edu/ProteoSAFe/status.jsp?task=ec08eed8f186430d893c63111409baf4>)
- 504 • IBD\_individual (MSV000079115;  
505 <https://gnps.ucsd.edu/ProteoSAFe/status.jsp?task=fad746939afd4184975a296436aebfb7>)
- 506 • IBD\_seed (MSV000082221;  
507 <https://gnps.ucsd.edu/ProteoSAFe/status.jsp?task=907f2e0b7878417dbdb4c83f0df0e83a>)
- 508 • IBD\_biobank (MSV000079777;  
509 <https://gnps.ucsd.edu/ProteoSAFe/status.jsp?task=a79fbd4c96124209adfd0ef84cb56dec>)
- 510 • IBD\_2 (MSV000084775;  
511 <https://gnps.ucsd.edu/ProteoSAFe/status.jsp?task=07f855658c5342458045032ea70fc526>)
- 512 • IBD\_200 (MSV000084908;  
513 <https://gnps.ucsd.edu/ProteoSAFe/status.jsp?task=55bef02250d744eb97c6040c379cbfb4>)
- 514 • Alzheimer's disease (MSV000085256;  
515 <https://gnps.ucsd.edu/ProteoSAFe/status.jsp?task=aac78e9d23b84194ab2f768cb685c636>)
- 516 • Covid-19 (MSV000085505; MSV000085537;  
517 <https://gnps.ucsd.edu/ProteoSAFe/status.jsp?task=9cbcb6b46fe24826bc56c9e893d0bd2b>)
- 518 • IBD\_biopsy (MSV000082220;  
519 <https://gnps.ucsd.edu/ProteoSAFe/status.jsp?task=a83a279dad154f9ca7b549d40ce117ba>)
- 520 • Gout (MSV000084908;  
521 <https://gnps.ucsd.edu/ProteoSAFe/status.jsp?task=55bef02250d744eb97c6040c379cbfb4>)
- 522 • Adult Saliva (MSV000083049;  
523 <https://gnps.ucsd.edu/ProteoSAFe/status.jsp?task=6dd6e5b1cf454d67b8a2b3c151c18f4a>)
- 524 • Legume supplementation (MSV000084663;  
525 <https://gnps.ucsd.edu/ProteoSAFe/status.jsp?task=93ba727aa9234727a73ae7860b2af3ca>)
- 526

527 Networking parameters were set based on the MOLECULAR-LIBRARYSEARCH-FDR workflow  
528 on GNPS with the following task IDs:

- 529 • GFOP3500: a7bf6cc3f91d466bab923f2268d6f4fc
- 530 • Sleep deprivation: b55ab4004ed342d7b4ed1c488e935998
- 531 • Sleep study: 78bbfed8574748d1a77dc7c2f1a44d39
- 532 • Sleep study\_SSF\_test: b55ab4004ed342d7b4ed1c488e935998
- 533 • Centenarian: 265a9553c69e47499cca3de056b43178
- 534 • Centenarian\_SSF\_test: 265a9553c69e47499cca3de056b43178
- 535 • American Gut: aee5dde3b2f84079a264e68ec981487e
- 536 • Fermented food consumption: a44d1b2e1b9d4612974d0b85021675a7
- 537 • Malawi legume supplement: de7b55f8adaa4ad9b2a8430e30435bf3
- 538 • Children with Medical Complexity: f27243af071b43ab90d846bda959fc1c
- 539 • Rotarix vaccine response: a2e02e3f97a54ca08e3866cc60f8d42b
- 540 • Impact of diet on RA: 62b8754e761549f3b94ffae83d7ab95a
- 541 • LP infant: 532aba2ad3644fadba0e6e7ea063c7ee
- 542 • IBD\_1: bb10b1ce90a24f3a9cef1e85e88c3882
- 543 • IBD\_biopsy: c4cfda90933b4842a7154f5f2def139d
- 544 • IBD\_individual: 3ce8cc636ae944848b4ada322aaf12fe
- 545 • IBD\_seed: ebbb715fc605457ba5f7e910b79d6177
- 546 • IBD\_biobank: 9465c34cf5444e12b89318b1fb363714
- 547 • IBD\_2: 983fa9271136404fb5743b44a6a109f0
- 548 • IBD\_200: e5acf5726722486caa897b2b07d402e8
- 549 • Impact of diet on RA: 62b8754e761549f3b94ffae83d7ab95a
- 550 • Alzheimer's disease: 658103164325425981c097cecba840b0
- 551 • Gout: a478f419ae824378aa02e5e1b310cad2
- 552 • Adulta saliva: 32980f95dbd5437aaa9e15d05c7246bb
- 553 • LP infant: 8fbfbc1bf38c418fb223306cd42af897
- 554 • LP infant: 3e414e13a4394bb78c07f7ca7f4d1be3
- 555 • Legume supplementation: 2ca007303b9c4bb3820f392b996eba27
- 556 • Alzheimer's disease: 658103164325425981c097cecba840b0
- 557 • Covid-19 Brazil: d16eb32276c84bdb9c35c5872e97a986

## 558 Methods

559 IRB information for the human datasets used in this study, made public on MassIVE  
560 Sleep study (MSV000083759; IRB 15-0282), centenarian (MSV000084591; IRB 180478), Impact  
561 of diet on RA (MSV000084556; IRB 161474 ), LP Infant (MSV000083462; MSV000083463; IRB  
562 151713 UCSD), Children with Medical Complexity (MSV000084610; IRB 161948 UCSD),  
563 American Gut (MSV000081981; IRB 141853 UCSD), Fermented food consumption  
564 (MSV000081171; IRB 141853 UCSD / published), Malawi legume supplement (MSV000081486;  
565 IRB ID #201503171; Washington University Human Studies Committee), Rotarix vaccine  
566 response (MSV000084218; IRB is PR-10060 from University of Virginia), IBD\_1  
567 (MSV000082431; IRB # 150675), IBD\_individual (MSV000079115; IRB # 150675), IBD\_seed

568 (MSV000082221; UCSD HRRP 131487), IBD\_biobank (MSV000079777; UCSD HRRP 131487);  
569 IBD\_2 (MSV000084775; IRB # 150675), IBD\_200 (MSV000084908; IRB # 150675), Alzheimer's  
570 disease (MSV000085256; UCSD IRB # 170957), Covid-19 (MSV000085505; MSV000085537;  
571 IRB approval number is 30248420.9.0000.5440 (University of São Paulo, Brazil), IBD\_biopsy  
572 (MSV000082220; IRB number is 120025), Gout (MSV000084908; IRB Project #160768X), Adult  
573 Saliva (MSV000083049; IRB 150275 UCSD), Legume supplementation (MSV000084663; IRB ID  
574 #201905103).

## 575 Global FoodOmics

### 576 Sample Collection

577 Sampling methodology was developed in order to facilitate sample collection in any environment,  
578 from the home, a restaurant, a festival, or in the lab. Initial samples were collected in a consistent  
579 manner, between April 2017 and March 2018. Additional sets of samples were added through  
580 Fall 2019. Each sample was assigned a unique number identifier upon sampling, which was used  
581 to trace the origin of the sample, and to organize descriptive information about the sample. In  
582 addition, when possible samples were photographed by the participant to create a photographic  
583 archive of all samples (uploaded to MassIVE MSV000084900; >4000 images representing 67%  
584 of the samples (2399/3579)). Primarily for the initial data set these images were used as the first  
585 point of reference for the collection of ancillary information about the different samples (termed  
586 metadata, described in more detail below). The image archive was critical, because as the project  
587 evolved and the breadth of sample types increased, new categories were added to the metadata,  
588 which were then filled in weeks or even months after sample collection.

589 Samples were frozen at -80°C within 24 h of sample collection, unless otherwise noted in  
590 the metadata. Two samples were collected for each food or beverage included in the study. One  
591 sample was collected as an archive and directly frozen, and a second sample was collected for  
592 extraction. Food samples were collected in a tube prefilled with 1 ml 95% ethanol (Ethyl alcohol  
593 (Sigma- Aldrich) and Invitrogen UltraPure™ Distilled Water), as high ethanol concentrations are  
594 efficacious at preserving the sample for both DNA and metabolite analyses (Song et al., 2016).  
595 Samples were collected into 2 ml round bottom microcentrifuge tubes (Qiagen) and weighed prior  
596 to freezing. The pre-sample and post-sample weights as well as the weight differences were  
597 recorded in the metadata. It was not possible to collect all samples at a given concentration of  
598 extraction solvent (ethanol), because sampling was performed in many different environments  
599 and is meant to be consistent with future crowd-based community science participation.  
600 Therefore, the data can be compared qualitatively and not quantitatively, however for certain  
601 subsets 50 mg of material was collected consistently.

602 Additional sets of food samples were added to the core set using the same methods as  
603 outlined above when possible. Samples from Venezuela were collected whole in absolute ethanol  
604  $\geq 99.8\%$  (Sigma Aldrich) and the extract was processed directly.

605 The experimental protocol for the sleep restriction and circadian misalignment study has  
606 been described previously (Sprecher et al., 2019). Meals and food samples were prepared by the  
607 Clinical and Translational Research Center Nutrition Core of the Colorado Clinical and  
608 Translational Sciences Institute. Food was transported to the research site and refrigerated for  
609 the duration of the in-patient study. Individual meals were sampled and stored frozen in ziploc



610 bags. They were stored at -80°C prior to subsampling and LC-MS/MS analysis. Images are  
611 contained in a separate Sleep Study folder (MSV000084900).

612 For several of the human studies we collected data on associated foods, which were  
613 processed according to the same methods as the Global FoodOmics samples. The number of  
614 SSF samples per cohort are outlined here: experimental sleep deprivation (197 samples; 45 are  
615 pooled); centenarian (38 individual samples); malawi legume supplement (14; 2 sample types,  
616 several extraction types); children with medical complexity (24 formula samples; 11 exact  
617 overlap); RA diet samples (20 individual sample; 2 samples types (stool, plasma), 2 time points));  
618 mother's milk (58 milk samples); legume supplements (15 individual legume samples; 6 different  
619 types).

## 620 Community-based science collection

621 The first sample collected was a carrot from a home garden. The participant was interested in  
622 how the soil conditions from prior tenants would impact the chemistry of the carrot, since the  
623 gardening practices of the prior tenant were unknown (organic or not, pesticide usage, etc.). In  
624 addition, home grown foods often taste different than store bought, likely reflected in the food  
625 metabolome.

626 During the course of sampling, samples were received from over 50 different individuals  
627 in California as well as from different states as well as countries (such as Venezuela, Italy and  
628 most recently Brazil). Contributions from individuals ranged from produce from home gardens,  
629 home fermented products (yogurt, kombucha, sauerkraut), meat and dairy from private farms, to  
630 items individuals had purchased that were of interest to them.

631 We were also directly invited to sample at local stores and organizations, including  
632 Venissimo cheese, Good Neighbor Gardens, and the San Diego Zoo and San Diego Zoo Safari  
633 Park, as well as local supermarkets such as Sprouts Farmers Market, Whole Foods Market, and  
634 Ralphs. We were invited by San Diego Fermenter's Club founder Austin Durant to the San Diego  
635 Fermenter's Club meeting and sampled from multiple vendors at both the Oregon Fermentation  
636 Festival in 2017 as well as the San Diego Fermentation Festival in 2018. We also received citrus  
637 samples from a farm at the US-Mexico border, with visibly dark skin due to air pollution, a  
638 particular concern of the farmer. Other sampling occurred in conjunction with study design, as  
639 was the case for the Rheumatoid arthritis cohort and the Covid-19 study. In total we engaged with  
640 a broad range of individuals, organizations, businesses and scientists, to generate this dataset of  
641 3579 samples (for future use this is already expanded beyond this number due to the collection  
642 of sets of SSF). A predominance of foods included in this initial dataset were sampled and/or  
643 purchased in California, leaving room for much further expansion and the inclusion of a crowd-  
644 sourced community science initiative to expand the array of samples.

645 The sample set contains a broad set of simple foods including fruits, vegetables, grains,  
646 as well as raw meat and fish, which build the foundation of many food products. In addition, we  
647 have 1133 fermented samples. This subcategorization of foods is made possible by the metadata  
648 collected on these samples, described in the Metadata Curation section. The breadth of samples  
649 included in the dataset necessitated careful collation and a range of information about the  
650 samples, resulting in 157 different metadata categories to describe various aspects of these food  
651 and beverage samples.

652 Samples originate from over 50 different identified countries of origin (Argentina, Australia,  
653 Austria, Belgium, Bolivia, Brazil, Canada, Chile, China, Columbia, Croatia, Ecuador, England,  
654 Ethiopia, France, Germany, Greece, Guatemala, Haiti, Holland/Netherlands, India, Indonesia,  
655 Ireland, Israel, Italy/Sardinia, Japan, Kenya, Korea, Madagascar, Malawi, Mexico, New Zealand,  
656 Nilgiri, Peru, Philippines, Poland, Serbia, Portugal, Russia, Scotland, South Africa, Spain,  
657 Switzerland, Taiwan, Thailand, Trinidad & Tobago, Turkey, UK, USA/Puerto Rico, Vietnam,  
658 Venezuela; EU, South America not included separately).

## 659 Metadata Curation

### 660 General organization

661 Detailed information about each sample was captured in the form of metadata. The metadata are  
662 in the form of an array, where each row represents one sample and each column captures unique  
663 information about the sample (See Supplementary Information for Metadata File, as well as  
664 updates on Massive MSV000084900). This matrix allows for the categorization of foods by  
665 various different attributes and links these attributes to the sample numbers, the data files  
666 (.mzXML filename), as well as the 16S sequence information on Qiita (sample\_name). The initial  
667 metadata categories captured included sample description, sample number, location sample was  
668 collected, the weight of the sample (pre-sample, post-sample, sample weight), the day it was  
669 collected, and whether an image had been taken and renamed to match the sample number and  
670 archived in the image repository. The initial 9 categories captured minimal information and  
671 allowed tracking of information about the sample.

672 During the process of sample collection, the diversity of the samples being collected  
673 necessitated the addition of columns to capture more information about the samples and to be  
674 able to categorize them and compare different attributes. These columns grew to capture highly  
675 detailed information about each sample, for example whether the sample was organic, if it was  
676 raw or cooked, if it was washed before sampling, or for cheese samples whether it is the rind or  
677 the curd, etc. As columns were added, the initial columns and the image repository were used to  
678 trace back information.

### 679 *Classification scheme*

680 Various classifiers are used to describe foods, however we were unable to find an established  
681 scheme able to capture the diversity of samples, as well as distill the metadata down into a  
682 manageable number of categories to distinguish differences between the metabolomes of  
683 different food classes. We therefore categorized the foods by sample\_type, which captured  
684 whether the sample was a food, beverage, or other item (for example supplements) and then  
685 expanded and shaped a unique categorization which takes into account the species and botanical  
686 definitions of foods. The sample\_type categories range from sample\_type\_land\_aquatic, to  
687 differentiate items sourced from different physical environments, sample\_type\_common, which  
688 allows for representation of a particular food group which was not otherwise captured in the  
689 metadata, such as zoo food or candy. The sample\_type groups also include a hierarchy from  
690 group1 to group6 (Levels 1 through 5 are referenced in this manuscript), specific to foods and  
691 groupB1 through groupB3 which contain beverage specific information (alcoholic [binary],  
692 carbonated [binary], type of beverage [such as red wine, kefir, soda, etc.]).

### 693 *Complex samples*

694 The above classification scheme gave sufficiently detailed information about simple foods (ones  
695 that have only one ingredient and could thus be filled out to the last group level, such as red cherry  
696 tomato). Complex foods contain not only multiple ingredients, but include highly processed foods  
697 purchased with ingredient lists as well as home cooked or restaurant meals. These foods have a  
698 higher variability of information known about them. The top 6 ingredients are captured in individual  
699 metadata categories, with a seventh ingredient field which contains the remainder of the  
700 ingredients (if known). However, the order of ingredients does not always clearly reflect the type  
701 of food and some constituents that may be of interest, such as tree nuts which may only be found  
702 in trace quantities. The `sample_type_common` category captured some of the information about  
703 the type of sample (candy), however to have a tangible classification of different ingredient types,  
704 we generated a specific complex food ontology based on the known presence of common  
705 categories (corn, dairy\*, egg\*, fruit, fungi, fish\*, shellfish\*, meat, peanut\*, seaweed, soy\*, tree nut\*,  
706 vegetable/herb, wheat\* (\*designates known food allergen)). These categories reflect the main  
707 food groups and some of the most common allergens (US FDA Food Allergen Labeling And  
708 Consumer Protection Act of 2004) (Sicherer and Sampson, 2006), items which are of interest  
709 when correlating food metabolome data with other datasets, such as human fecal material (where  
710 the foods eaten are known or unknown).

### 711 *Fermented foods*

712 Preservation and processing method are included in the metadata. However, due to the potential  
713 importance of fermentation in the alteration of the food metabolome, and the potential health  
714 benefits that have been ascribed to fermented foods, several categories were included to highlight  
715 this feature: fermented or not, whether it contains live active cultures, whether it contains  
716 chocolate (which then was cross checked with the fermented category, as chocolate is a  
717 fermented food). The list of fermented foods crosses many of our sample types as it includes  
718 fermented dairy (yogurt, cheese), fermented meat/fish (salami, fish sauce), fermented vegetables  
719 (kimchi, sauerkraut), fermented fruit (chocolate, coffee), and fermented grains/legumes (bread,  
720 tempeh).

### 721 *Food specific categories*

722 Certain individual food categories also necessitated creation of specific categorization. For  
723 example, cheeses have the specific categories `cheese_part` (curd vs. rind), `cheese_type`  
724 (washed, blue, etc), and `cheese_texture` (soft, semi-soft, semi-hard, hard). Particularly for raw  
725 plant products, such as fruits, vegetables, grains which form the basis for many food ingredients,  
726 we captured botanical information: `botanical_anatomy` (fruit, leaf, tuber, seed, etc.),  
727 `botanical_genus`, and `botanical_genus_species` (when known). Tea samples have tea quality and  
728 tea type as distinct categories.

### 729 Metadata for Cross-study Comparison

730 To facilitate cross study comparison, we included the Earth Microbiome Project ontology: `emp_o_1`  
731 (level 1: Free-living, Host-associated, Control, or Unknown), `emp_o_2` (level 2: Saline, Non-saline,  
732 Animal, Plant, or Fungus), and `emp_o_3` (level 3: most specific habitat name)  
733 [[http://www.earthmicrobiome.org/protocols-and-standards/emp\\_o/](http://www.earthmicrobiome.org/protocols-and-standards/emp_o/)]. Wherever possible we linked

734 foods to food identifiers or created identifiers and categories that built upon the existing framework  
735 as defined by the U.S. Department of Agriculture's Food and Nutrient Database for Dietary  
736 Studies 2011-2012 (FNDDS) food grouping scheme (Martin et al., 2012).

### 737 Sample Preparation

738 A sterile stainless steel bead was added to each sample collected in ethanol and the samples  
739 were thawed on ice for 30 min. Samples were homogenized at 25–30 Hz for 5 min using a tissue  
740 homogenizer (QIAGEN TissueLyzer II, Hilden, Germany). Samples were swabbed with sterile  
741 dual tip swabs (BD swubes) and frozen immediately at -80°C until DNA extraction.

### 742 DNA Extraction and 16S rRNA gene amplicon sequencing

743 DNA extraction and 16S rRNA gene amplicon sequencing were performed using Earth  
744 Microbiome Project (EMP) standard protocols (<http://www.earthmicrobiome.org/protocols-and-standards/16s>) (Thompson et al., 2017). DNA was extracted with the Qiagen MagAttract  
746 PowerSoil DNA kit as previously described (Marotz et al 2017). Amplicon PCR was performed on  
747 the V4 region of the 16S rRNA gene using the primer pair 515f-806r with Golay error-correcting  
748 barcodes on the reverse primer. Amplicons were barcoded and pooled in equal concentrations  
749 for sequencing. The amplicon pool was purified with the MO BIO UltraClean PCR cleanup kit and  
750 sequenced on the Illumina MiSeq sequencing platform. Raw sequence data were uploaded to  
751 Qiita for pre-analysis processing (Qiita study ID: 11442) (Gonzalez et al., 2018). In Qiita, raw  
752 sequence data were demultiplexed and minimally quality-filtered using the QIIME 1.9.1 script  
753 `split_libraries_fastq.py`, with a Phred quality threshold of 3, allowing for reverse complemented  
754 barcodes and mapping barcodes, and default parameters. Demultiplexed, quality-filtered  
755 sequence data were then trimmed to a read length of 150-bp, denoised with Deblur v1.1.0 (Amir  
756 et al., 2017) using default parameters, and subject to fragment insertion with SATÉ-enabled  
757 Phylogenetic Placement (Janssen et al., 2018) into the GreenGenes 13.8 reference phylogeny  
758 (McDonald et al., 2012), using default parameters, to generate an inclusive phylogeny. An  
759 observation table of per-sample counts of Deblur sub-operational taxonomic units were output  
760 into BIOM format for analyses (n = 1511 samples). Outside of Qiita, we assigned taxonomy to  
761 denoised reads using QIIME2's feature-classifier, `classify-sklearn`, using the GreenGenes 13.8  
762 pre-fitted sklearn-based classifier (i.e., 99% OTUs, 515f/806r region of sequences), and default  
763 parameters (Bokulich et al., 2018; Bolyen et al., 2019).

764

## 765 SourceTracker analyses

766 SourceTracker 2.0.1 (<http://github.com/biota/sourcetracker2>) was used to predict the proportion  
767 of microbial source environment contributions to a sink using a Bayesian classification model  
768 together with Gibbs sampling (Knights et al., 2011). The Deblur 150-bp observation table  
769 consisting of 1511 food samples was used as the set of source environments and the Rheumatoid  
770 Arthritis (RA) data set consisting of 49 fecal samples was used as the sink. All source and sink  
771 samples were rarefied to 2000 sequences per sample before source-tracking and doubleton  
772 ASVs were removed. Leave-one-out cross-validation was used to predict the source samples with  
773 heterogeneity from all other food categories. After source sample filtering a total of 346 samples  
774 representing a total of 25 broad food categories were retained. Food microbial source  
775 contributions were then predicted for RA samples and the difference in food contribution before  
776 and after diet intervention was calculated and compared by diet recommendations.

## 777 Metabolite Extraction

778 Homogenized samples were incubated for 40 min at -20°C and centrifuged (Eppendorf centrifuge  
779 5418, Hamburg, Germany) at 20,000 rpm for 15 min at 4°C. 400 µL of supernatant were  
780 transferred to a 96-well deep well plate and dried by centrifugal evaporation (Labconco Acid-  
781 Resistant Centrivap Concentrator, Missouri, USA). Dried extracts were reconstituted in 150 µL of  
782 resuspension solution (50% methanol with 2 µM sulfadimethoxine), then vortexed for 2 min and  
783 sonicated for 5 min in a bath water (Branson 5510, Connecticut, USA). Resuspended extracts  
784 were then centrifuged for 15 min at 20,000 rpm and 4°C (Thermo SORVALL LEGEND RT,  
785 Germany) and transferred to a 96-well shallow well plate, and diluted either 5x or 10x to avoid  
786 saturating the MS detector.

## 787 Liquid Chromatography - Mass Spectrometry

788 Food extracts were analyzed using a UltiMate 3000 UHPLC system (Thermo Scientific, Waltham,  
789 Ma) equipped with a reverse phase C18 column, prepended with a guard cartridge (Kinetex, 100  
790 x 2.1 mm, 1.7 µm particles size, 100 Å pore size; Phenomenex, Torrance, CA, USA), at a column  
791 compartment temperature of 40°C. Samples were chromatographically separated with a constant  
792 flow rate of 0.5 ml / min using the following gradient: 1.5 min isocratic at 5% B, up to 100% B in 8  
793 min, 3 min isocratic at 100% B, back to 5% B in 0.5min and then 1.5min isocratic at 5% B (A: H<sub>2</sub>O  
794 + 0.1% formic acid; B: Acetonitrile (ACN) + 0.1% formic acid (LC-MS grade solvents, Fisher  
795 Chemical, Hampton, United States)).

796 The UHPLC system was coupled to a Maxis Q-TOF Impact II mass spectrometer (Bruker  
797 Daltonics, Bremen, Germany) equipped with an electrospray ionization source. MS spectra were  
798 acquired in positive ionization mode using Data Dependent Acquisition (DDA) with a mass range  
799 of  $m/z$  50–1500. The instrument was externally calibrated two times per day to 1.0 ppm mass  
800 accuracy using ESI-L Low Concentration Tuning Mix (Agilent Technologies, Waldbronn,  
801 Germany). Hexakis ( $m/z$  622.029509; (1H, 1H, 2H difluoroethoxy)phosphazene (Synquest  
802 Laboratories, Alachua, FL)) was used for lock mass correction. MS/MS spectra were acquired for  
803 the top 5 ions in each MS1 spectrum, with active exclusion after 2 spectra (maintained for 30  
804 seconds). Known contaminants as well as lock mass values commonly used with this instrument

805 were added to an exclusion list ( $m/z$  values listed): 144.49–145.49; 621.00–624.10; 643.80–  
806 646.00; 659.78–662.00; 921.0–925.00; 943.80–946.00; 959.80–962.00.

807 Raw high resolution mass spectrometry data files were converted to open source .mzXML  
808 format using Bruker DataAnalysis software after lock mass correction ( $m/z$  622.0290). Raw data  
809 files as well as converted .mzXML files were uploaded to MassIVE (publicly available under  
810 unique identifier MSV000084900) and further analyzed on Global Natural Product Social  
811 Molecular Networking (GNPS) (<https://gnps.ucsd.edu>), as described below.

## 812 MS2 Data Processing

### 813 *FDR estimation*

814 False discovery rate (FDR) estimation was calculated using Passatutto analysis workflow in  
815 GNPS (Scheubert et al. 2017; Wang et al. 2016). FDR estimation was used to determine the  
816 cosine value required with a minimum of 5 matched peaks to achieve an FDR of 1%. See the  
817 Data availability section for accession information.

818 *Molecular networking using GNPS:* Molecular networking analysis and library search were  
819 performed using GNPS classical molecular networking release\_18 (Wang et al. 2016). 3579  
820 .mzXML data files (available at MassIVE ID MSV000084900) were included in the analysis. The  
821 data were filtered by removing all MS/MS peaks within +/- 17  $m/z$  of the precursor  $m/z$ . MS/MS  
822 spectra were window filtered by choosing only the top 5 peaks in the +/- 50  $m/z$  window throughout  
823 the spectrum. The data was then clustered with MS-Cluster with a parent mass tolerance of 0.02  
824  $m/z$  and an MS/MS fragment ion tolerance of 0.02  $m/z$  to create consensus spectra. Further,  
825 consensus spectra that contained less than 2 spectra were discarded. A network was then  
826 created where edges were filtered to have a cosine score above 0.65 (slight variation per study  
827 based on FDR calculation) and more than 5 matched peaks. Further edges between two nodes  
828 were kept in the network if and only if each of the nodes appeared in each other's respective top  
829 10 most similar nodes. The spectra in the network were then searched against the GNPS spectral  
830 libraries. The library spectra were filtered in the same manner as the input data. All matches kept  
831 between network spectra and library spectra were required to have the same cosine score and  
832 minimum matched peaks as for library search. Version release 18 was used to process all studies  
833 with the exception of the Covid-19 dataset, which was processed with identical methods and  
834 version 23.

835 Molecular networks were visualized in the GNPS browser as well as with the freely  
836 available program Cytoscape (version 3.5.1) (Shannon et al., 2003).

### 837 *Interpreted spectral rate calculation*

838 The levels of interpretation are delineated as follows: A spectral match between an MS/MS  
839 spectrum from human or food data with a library spectrum constitutes a *molecular ID* and  
840 determines the initial percent of interpreted spectra, which is also equivalent to the annotation  
841 rate of the dataset. A spectral match between MS/MS spectra in human and reference samples  
842 (by performing molecular networking of the datasets together and identifying nodes with overlap  
843 between the two groups) indicates a *potential source*. Matches between human and food data  
844 therefore implicate food as the potential source of the molecule. Food reference data are referred  
845 to in two main categories: the Global FoodOmics dataset (GFOP; broad range of foods and

846 beverages) and study specific food (SSF; foods and/or beverages known to be consumed by  
847 some participants). The last level of interpretation is based on connectivity within a molecular  
848 family, which allows us to infer *structural relatedness* or *possible metabolism* of food derived  
849 compounds.

850 Food reference data and human data were organized into separate groups in the  
851 molecular networking analysis. The annotation and interpreted spectral rates were calculated  
852 using R (3.6.3) and the *tidyr* and *dplyr* packages. We first calculated percent annotation rate, or  
853 molecular ID, for all studies (stool, plasma, etc.) (i.e. # of stool nodes with a molecular ID / total #  
854 of stool nodes). Spectral matches between food reference data and human MS data (overlap  
855 between the two groups) provides the next level of information, referred to as the interpreted  
856 spectral rate (i.e. # of nodes found in food and stool data / total # of stool nodes), indicating a  
857 potential food source.

858 For molecules without annotations to reference libraries, we wanted to measure the  
859 potential to explain their presence using molecular networking. By removing single loops in each  
860 dataset and comparing metabolites that shared a component index with an annotated compound,  
861 we were able to identify molecules that belong to the same molecular family to infer their potential  
862 classification, and calculate the interpreted spectral rate by dividing unannotated molecules that  
863 network with annotated ones by total metabolites within each sample type. Overlap between  
864 sample types was again assessed to understand contributions due to co-networking of molecules  
865 across sample types, increasing our ability to explain unannotated molecules found in our  
866 datasets. Visualizations were generated using *graphics* and *beeswarm* packages, and significant  
867 differences were calculated using Welch's *t*-tests (*stats::t.test*), Welch's F-test  
868 (*onewaytests::welch.test*), and Games-Howell (*rstatix::games\_howell\_test*) for multiple  
869 comparisons, as appropriate, with multiple comparisons correction using Tukey's method. All data  
870 are expressed as the mean  $\pm$  standard error and considered significant if  $P < 0.05$  unless  
871 otherwise stated.

872 For example, for GNPS molecular networking analyses test datasets were consistently  
873 placed in group 1 (G1) (and G2 for paired datasets, such as stool and plasma) and Global  
874 FoodOmics data were placed in group 4 (G4). SSF were consistently placed in G3 when used.  
875 The common nodes between G1 and G4 represent the overlap and potential enhancement of  
876 information, directly from the reference dataset. The improvement is thus measured by the  
877 difference in the overlap of G1 and G4 divided by the total nodes in G1 versus the # of annotations  
878 in G1 divided by the total nodes in G1. The "propagation" refers to the counting of nodes within  
879 connected components in molecular families which capture three types of additional information:  
880 1) unannotated compounds found only in G1 that network with an annotated compound found in  
881 G4 (could be an annotated molecule observed only in G4 or in G4 and G1), 2) unannotated  
882 compounds found only in G1, but in the same molecular family with an unannotated food  
883 compound (G4), or 3) unannotated compounds found only in G1, but in the same molecular family  
884 with an annotated food compound (G4). The increase shown for Total is taking into account the  
885 # of unique nodes from the three different types of molecular connectivity. The second is the  
886 largest contributor.

## 887 Metadata inference - food count generation

888 Food counts were calculated as the number of consensus nodes in the molecular networking  
889 results that match to food samples. Consensus nodes were required to match to all of the relevant  
890 experiment groups (sample type, GFOP, optionally SSF) and not match to any of the other  
891 experiment groups. All source file names corresponding to the filtered consensus nodes were  
892 matched to the GFOP file names and metadata to derive counts of the foods at different levels of  
893 the food hierarchy. Infrequent food types that occurred less often than water (presumed blank)  
894 were removed to filter out sporadic random matches.

895 For the flow diagrams the food counts for the complete datasets were calculated at  
896 different levels of the metadata hierarchy. Flow diagrams were generated in Python (version 3.8)  
897 using Pandas (version 0.25.3) (McKinney, 2010), NumPy (version 1.18.1) (van der Walt et al.,  
898 2011), and floweaver (version 2.0.0a5) (Lupton and Allwood, 2017).

## 899 Diet validation with RA dataset

900 The food counts at the fifth hierarchy level were extracted for each individual raw file and used to  
901 construct a feature table. The occurrences were summed across groups (diet intervention),  
902 divided by the total number of samples in each group, respectively and the difference was  
903 calculated. These differences were then compared with the ITIS diet recommendations by food  
904 category. Foods were grouped into one of four categories: avoid, include, restricted, and not  
905 specified.

906 Diet diary entries were tabulated across over 200 categories and the closest matches to  
907 the food categories identified by MS were identified. The corresponding diet data was tabulated  
908 based on the number of times a category was reported during the three time points prior to the  
909 diet change (pre-intervention) and the three time points prior to sample collection of the final time  
910 point (post-intervention; during the intervention). The sum of the three days per diet category was  
911 then divided by the total number of samples in the pre vs. post sample group, respectively (to  
912 account for missing self-reported information). Three days were chosen as a representation of  
913 foods most likely to be detected (Johnson et al., 2019). Categories were matched as closely as  
914 possible to those in the FoodOmics ontology.

## 915 Dataset descriptions

916 All human datasets were processed by LC-MS/MS on high resolution mass spectrometers, in  
917 positive ionization mode.

918 Data were collected for the following studies using a QTOF mass spectrometer and similar  
919 methods as those outlined above: American Gut (MSV000081981), Children with Medical  
920 Complexity (MSV000084610), Rotarix vaccine response (MSV000084218), Malawi legume  
921 supplement (MSV000081486), IBD\_1 (MSV000082431), IBD\_individual (MSV000079115),  
922 Fermented food consumption (MSV000081171) (Taylor et al., 2020). The Sleep deprivation  
923 (MSV000083759; IRB 15-0282), centenarian (MSV000084591; IRB 180478), and Legume  
924 supplementation (MSV000084663) studies were analyzed using the methods described above  
925 and described in (Gauglitz et al., 2020a). The LP Infant (MSV000083462; MSV000083463),  
926 IBD\_seed (MSV000082221), IBD\_biobank (MSV000079777), IBD\_2 (MSV000084775), IBD\_200



927 (MSV000084908), IBD\_biopsy (MSV000082220), Gout (MSV000084908), Adult Saliva  
928 (MSV000083049) datasets were collected as described previously (Gauglitz et al., 2020b).

929 The datasets for the impact of diet on RA (MSV000084556) and Alzheimer's disease  
930 (MSV000085256) were collected with similar methods on a Q-exactive Orbitrap mass  
931 spectrometer (Thermo Scientific). The Alzheimer samples include Alzheimer's Disease and  
932 elderly controls, and were drawn in the early morning after fasting for at least 6 hours.

933 The food and plasma data for the Covid-19 study (MSV000085505; MSV000085537) were  
934 collected at the University of São Paulo, Brazil, as described below: Plasma samples were  
935 collected from patients with laboratory confirmed Covid-19 who were admitted to the Special Unit  
936 for the Treatment of Infectious Diseases (UETDI) at the General Hospital of the Medical School  
937 of Ribeirão Preto (HC-FMRP-USP). Previously, clarifications to patients occurred both orally and  
938 in writing, based on the printed text of the Free and Informed Consent Form, which contained the  
939 general proposal of the study, the procedures for obtaining the samples, the risks and benefits.  
940 In addition, they were assured about confidentiality of their name, personal data and the possibility  
941 of giving up their participation at any time. Following the signature, patients received a copy of  
942 the informed consent form. The following were included: 1) Patients diagnosed with Covid-19 in  
943 moderate, severe or critical forms and in need of hospital treatment; 2) Over 18 years old; 3) At  
944 least 50 kg of body weight; 4) Admission electrocardiogram without changes in rhythm and with  
945 QT interval <450 ms; 5) normal serum levels of Ca<sup>2+</sup> and K<sup>+</sup>; 6) If a woman, between 18 and 50  
946 years old, negative β-HCG test on admission. Patients were excluded who: 1) have the mild forms  
947 of SARS-CoV-2; 2) pregnant; 3) unable to understand the information contained in the Free and  
948 Informed Consent Form (ICF).

949 Sample preparation: For the Covid-19 plasma samples, aliquots of 20 μL were transferred  
950 to eppendorf tubes and 120 μL of cold extracting solution, MeOH: MeCN (1: 1, v/v) was added.  
951 After orbital shaking for 1 min (Gehaka AV-2 Shaker, São Paulo, Brazil), the samples were left at  
952 -20 °C for 30 minutes and then centrifuged for 10 min at 20000 × g at 4 °C (Centrifuge Boeco  
953 Germany M-240R, Germany). An aliquot of the organic phase (120 μL) was transferred to another  
954 eppendorf tube and evaporated to dryness in a rotary vacuum concentrator for 60 min, at 30 °C  
955 (Analytica, Christ RVC2-18, São Paulo). The residues were resuspended in 80 μL of H<sub>2</sub>O and  
956 centrifuged (10 min, 5000 ×g, 4 °C), an aliquot of 5 μL was injected.

957 Mass spectrometry data collection plasma sample extracts were chromatographically  
958 separated with anHPLC (Shimadzu, Tokyo, Japan), coupled with a micrOTOF-Q II mass  
959 spectrometer (Bruker Daltonics, Boston, MA, USA) equipped with an ESI source and a  
960 quadrupole-time of flight analyzer (qTOF, Bruker Daltonics Inc., Billerica, MA, USA). For  
961 chromatographic analyses, we employed a Kinetex C18 column (1.7 μm, 100 × 2.1 mm)  
962 (Phenomenex, Torrance, CA, USA) kept at 40 °C, with a flow rate of 0.3 mL/min. A linear gradient  
963 was applied: 0-1.5 min isocratic at 5% B, 1.5-9.5 min 100% B, 9.5-12 min isocratic at 100% B,  
964 12-12.5 min 5% B, 12.5-14 min 5% B; where mobile phase A is water with 0.1% formic acid (v/v)  
965 and phase B is acetonitrile 0.1% formic acid (v/v) (LC-MS grade solvents). The MS data were  
966 acquired in positive mode using an MS range of *m/z* 50–1500. The equipment was calibrated with  
967 trifluoroacetic acid (TFA) every day, and internally during each run. The MS parameters were  
968 established as follows: end plate offset, 450 V; capillary voltage, 3500 V; nebulizer gas pressure,  
969 4.0 Bar; dry gas flow, 9 L/min; dry temperature, 220 °C.

970 For data dependent acquisition the five most abundant ions per MS1 scan were  
971 fragmented and the spectra collected. MS/MS active exclusion was set after 2 spectra and  
972 released after 30 seconds. A fragmentation exclusion list was set:  $m/z$  144.49-145.49; 621.00-  
973 624.10; 643.80- 646.00; 659.78-662.00; 921.0-925.00; 943.80-946.00; 959.80-962.00 to exclude  
974 known contaminants and infused lock mass compounds. A process blank was run every 5  
975 samples; 5  $\mu\text{L}$  of a standard mix [Paclitaxel 1  $\text{mg L}^{-1}$ , and Diazepam 1  $\text{mg L}^{-1}$ ] (Sigma-Aldrich,  
976 Saint Louis, Missouri, US) in 50% MeOH (LC-MS grade solvents) was injected every 5 samples.  
977 All MS data were analyzed with Bruker Compass DataAnalysis 4.3 software (Bruker Daltonics,  
978 Boston, MA, USA).

979 A metadata file was created grouping all available clinical information from patients with  
980 laboratory confirmed Covid-19 and essential analysis specifications. The MS/MS data were  
981 calibrated with an internal standard (TFA), converted to mzXML files using MSConvert from the  
982 ProteoWizard software (Chambers et al., 2012) and then uploaded into the Global Natural  
983 Products Social Molecular Networking web-platform (<https://gnps.ucsd.edu/>). All MS data  
984 (.mzXML files) and metadata (.txt file) are publically available via GNPS/MassIVE  
985 (<https://massive.ucsd.edu/>) under accession number MSV000085373.

986

987 Supplement

988 **Table S1. Metadata** [available also on MassIVE under ID MSV000084900]

989 **Table S2.** Overview of public studies used in analysis. Each sample type represents an individual  
990 dataset.

| Study                                   | Sample Type          | SSF       | Num samples               | Massive ID                    |
|-----------------------------------------|----------------------|-----------|---------------------------|-------------------------------|
| <b>GFOP3500</b>                         | Food                 | N/A       | 3527                      | MSV000084900                  |
| <b>Sleep study</b>                      | Fecal;<br>Plasma     | yes (197) | 98 (F); 371 (P)           | MSV000083759                  |
| <b>Centenarian</b>                      | Fecal;<br>Plasma     | yes (38)  | 91 (F); 50 (P)            | MSV000084591                  |
| <b>Impact of diet on RA</b>             | Fecal;<br>Plasma     | yes (12)  | 51 (F); 60 (P)            | MSV000084556                  |
| <b>LP Infant</b>                        | Fecal; Oral;<br>Skin | yes (58)  | 492(F); 461(O);<br>461(S) | MSV000083462;<br>MSV000083463 |
| <b>Children with Medical Complexity</b> | Fecal                | yes (24)  | 95                        | MSV000084610                  |
| <b>American Gut</b>                     | Fecal                |           | 2123                      | MSV000081981                  |
| <b>Fermented food consumption</b>       | Fecal                |           | 276                       | MSV000081171                  |
| <b>Malawi legume supplement</b>         | Fecal                | yes (14)  | 1131                      | MSV000081486                  |
| <b>Rotarix vaccine response</b>         | Fecal                |           | 118                       | MSV000084218                  |
| <b>IBD_1</b>                            | Fecal                |           | 40                        | MSV000082431                  |
| <b>IBD_individual</b>                   | Fecal                |           | 5                         | MSV000079115                  |
| <b>IBD_seed</b>                         | Fecal                |           | 334                       | MSV000082221                  |
| <b>IBD_biobank</b>                      | Fecal                |           | 95                        | MSV000079777                  |
| <b>IBD_2</b>                            | Fecal                |           | 206                       | MSV000084775                  |
| <b>IBD_200</b>                          | Fecal                |           | 203                       | MSV000084908                  |
| <b>Alzheimer's disease</b>              | Plasma; CSF          |           | 78 (P);<br>116 (CSF)      | MSV000085256                  |
| <b>Covid-19 Brazil</b>                  | Plasma               | yes (60)  | 46                        | MSV000085505;<br>MSV000085537 |
| <b>IBD_biopsy</b>                       | Tissue               |           | 135                       | MSV000082220                  |
| <b>Gout</b>                             | Serum                |           | 39                        | MSV000084908                  |
| <b>Adult saliva</b>                     | Saliva               |           | 89                        | MSV000083049                  |

|                               |       |          |   |              |
|-------------------------------|-------|----------|---|--------------|
| <b>Legume supplementation</b> | Urine | yes (15) | 5 | MSV000084663 |
|-------------------------------|-------|----------|---|--------------|

991  
992

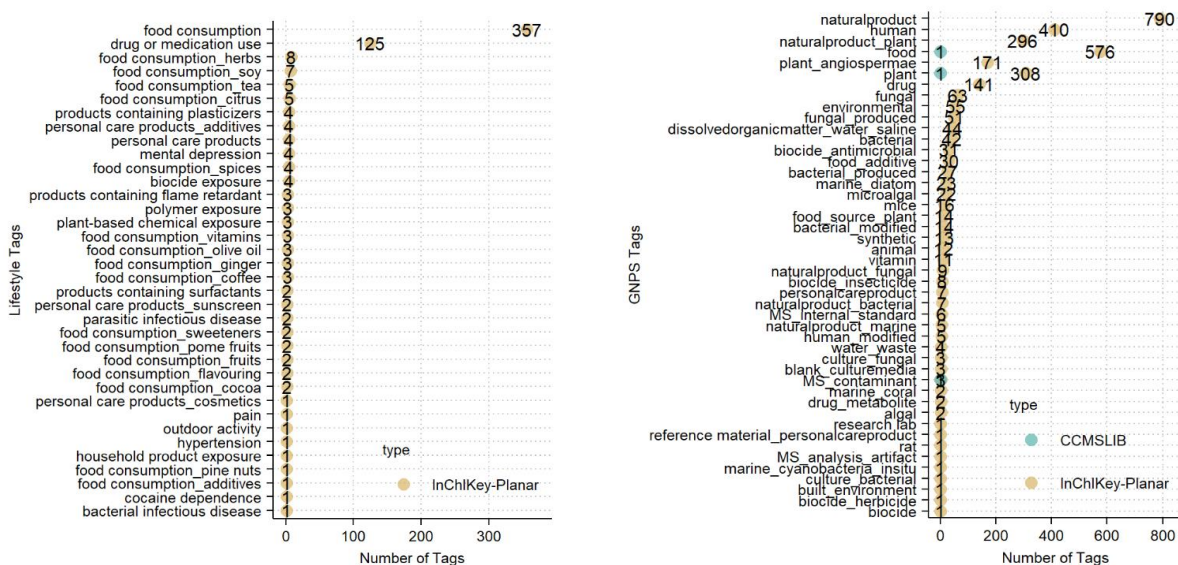

993  
994  
995  
996  
997  
998  
999  
1000  
1001  
1002  
1003

**Figure S1.** GNPS tag and GNPS Lifestyle Tag distribution for the Global FoodOmics reference data set (GNPS task ID: f1a1f3a61aca416a9b3687d72488da7f). Annotated MS/MS spectra were assigned planar InChIKeys, and at least one tag. Spectra can be assigned multiple tags, indicating multiple potential sources. 1131 total unique planar InChIKeys with at least one GNPS tag. **a.** Lifestyle tags and **b.** GNPS tags.

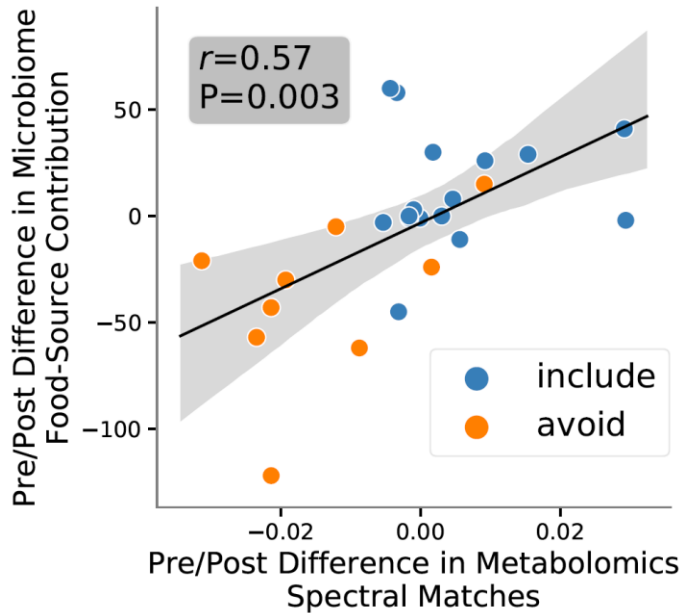

1004  
1005 **Figure S2.** Linear regression scatter plot of difference in food contributions for metabolite spectral  
1006 match (x-axis) and microbes by source tracking prediction (y-axis) before vs. after diet intervention  
1007 compared by diet recommendation of avoid (orange) or include (blue). Correlation evaluated by  
1008 Pearson correlation coefficient.

## 1009 References

- 1010 Amir, A., McDonald, D., Navas-Molina, J.A., Kopylova, E., Morton, J.T., Zech Xu, Z., Kightley,  
1011 E.P., Thompson, L.R., Hyde, E.R., Gonzalez, A., et al. (2017). Deblur Rapidly Resolves Single-  
1012 Nucleotide Community Sequence Patterns. *mSystems* 2.
- 1013 Aron, A.T., Gentry, E.C., McPhail, K.L., Nothias, L.-F., Nothias-Esposito, M., Bouslimani, A.,  
1014 Petras, D., Gauglitz, J.M., Sikora, N., Vargas, F., et al. (2020). Reproducible molecular  
1015 networking of untargeted mass spectrometry data using GNPS. *Nat. Protoc.* 15, 1954–1991.
- 1016 Barabási, A.-L., Menichetti, G., and Loscalzo, J. (2020). The unmapped chemical complexity of  
1017 our diet. *Nature Food* 1, 33–37.
- 1018 Bokulich, N.A., Kaehler, B.D., Rideout, J.R., Dillon, M., Bolyen, E., Knight, R., Huttley, G.A., and  
1019 Gregory Caporaso, J. (2018). Optimizing taxonomic classification of marker-gene amplicon  
1020 sequences with QIIME 2's q2-feature-classifier plugin. *Microbiome* 6.
- 1021 Bolyen, E., Rideout, J.R., Dillon, M.R., Bokulich, N.A., Abnet, C.C., Al-Ghalith, G.A., Alexander,  
1022 H., Alm, E.J., Arumugam, M., Asnicar, F., et al. (2019). Reproducible, interactive, scalable and  
1023 extensible microbiome data science using QIIME 2. *Nat. Biotechnol.* 37, 852–857.
- 1024 Bono, H. (2020). All of gene expression (AOE): An integrated index for public gene expression  
1025 databases. *PLoS One* 15, e0227076.
- 1026 Bouslimani, A., Melnik, A.V., Xu, Z., Amir, A., da Silva, R.R., Wang, M., Bandeira, N.,  
1027 Alexandrov, T., Knight, R., and Dorrestein, P.C. (2016). Lifestyle chemistries from phones for

- 1028 individual profiling. *Proc. Natl. Acad. Sci. U. S. A.* *113*, E7645–E7654.
- 1029 Bustamante, M.F., Agustín-Perez, M., Cedola, F., Coras, R., Narasimhan, R., Golshan, S., and  
1030 Guma, M. (2020). Design of an anti-inflammatory diet (ITIS diet) for patients with rheumatoid  
1031 arthritis. *Contemp Clin Trials Commun* *17*, 100524.
- 1032 Center for Food Safety, and Nutrition, A. (2019). *Food Defect Levels Handbook*.
- 1033 Chambers, M.C., Maclean, B., Burke, R., Amodei, D., Ruderman, D.L., Neumann, S., Gatto, L.,  
1034 Fischer, B., Pratt, B., Egertson, J., et al. (2012). A cross-platform toolkit for mass spectrometry  
1035 and proteomics. *Nat. Biotechnol.* *30*, 918–920.
- 1036 Gauglitz, J.M., Aceves, C.M., Aksenov, A.A., Aleti, G., Almaliti, J., Bouslimani, A., Brown, E.A.,  
1037 Campeau, A., Caraballo-Rodríguez, A.M., Chaar, R., et al. (2020a). Untargeted mass  
1038 spectrometry-based metabolomics approach unveils molecular changes in raw and processed  
1039 foods and beverages. *Food Chem.* *302*, 125290.
- 1040 Gauglitz, J.M., Morton, J.T., Tripathi, A., Hansen, S., Gaffney, M., Carpenter, C., Weldon, K.C.,  
1041 Shah, R., Parampil, A., Fidgett, A.L., et al. (2020b). Metabolome-Informed Microbiome Analysis  
1042 Refines Metadata Classifications and Reveals Unexpected Medication Transfer in Captive  
1043 Cheetahs. *mSystems* *5*.
- 1044 Gonzalez, A., Navas-Molina, J.A., Kosciolk, T., McDonald, D., Vázquez-Baeza, Y.,  
1045 Ackermann, G., DeReus, J., Janssen, S., Swafford, A.D., Orchanian, S.B., et al. (2018). Qiita:  
1046 rapid, web-enabled microbiome meta-analysis. *Nat. Methods* *15*, 796–798.
- 1047 Haug, K., Cochrane, K., Nainala, V.C., Williams, M., Chang, J., Jayaseelan, K.V., and  
1048 O'Donovan, C. (2020). MetaboLights: a resource evolving in response to the needs of its  
1049 scientific community. *Nucleic Acids Res.* *48*, D440–D444.
- 1050 Horai, H., Arita, M., Kanaya, S., Nihei, Y., Ikeda, T., Suwa, K., Ojima, Y., Tanaka, K., Tanaka,  
1051 S., Aoshima, K., et al. (2010). MassBank: a public repository for sharing mass spectral data for  
1052 life sciences. *J. Mass Spectrom.* *45*, 703–714.
- 1053 Huang, R., Zhu, H., Shinn, P., Ngan, D., Ye, L., Thakur, A., Grewal, G., Zhao, T., Southall, N.,  
1054 Hall, M.D., et al. (2019). The NCATS Pharmaceutical Collection: a 10-year update. *Drug Discov.*  
1055 *Today* *24*, 2341–2349.
- 1056 Janssen, S., McDonald, D., Gonzalez, A., Navas-Molina, J.A., Jiang, L., Xu, Z.Z., Winker, K.,  
1057 Kado, D.M., Orwoll, E., Manary, M., et al. (2018). Phylogenetic Placement of Exact Amplicon  
1058 Sequences Improves Associations with Clinical Information. *mSystems* *3*.
- 1059 Jarmusch, A.K., Wang, M., Aceves, C.M., Advani, R.S., Aguire, S., Aksenov, A.A., Aleti, G.,  
1060 Aron, A.T., Bauermeister, A., Bolleddu, S., et al. (2019). Repository-scale Co- and Re-analysis  
1061 of Tandem Mass Spectrometry Data.
- 1062 Johnson, A.J., Vangay, P., Al-Ghalith, G.A., Hillmann, B.M., Ward, T.L., Shields-Cutler, R.R.,  
1063 Kim, A.D., Shmagel, A.K., Syed, A.N., Personalized Microbiome Class Students, et al. (2019).  
1064 Daily Sampling Reveals Personalized Diet-Microbiome Associations in Humans. *Cell Host*  
1065 *Microbe* *25*, 789–802.e5.
- 1066 Knights, D., Kuczynski, J., Charlson, E.S., Zaneveld, J., Mozer, M.C., Collman, R.G., Bushman,

- 1067 F.D., Knight, R., and Kelley, S.T. (2011). Bayesian community-wide culture-independent  
1068 microbial source tracking. *Nat. Methods* 8, 761–763.
- 1069 Kyle, J.E., Crowell, K.L., Casey, C.P., Fujimoto, G.M., Kim, S., Dautel, S.E., Smith, R.D., Payne,  
1070 S.H., and Metz, T.O. (2017). LIQUID: an open source software for identifying lipids in LC-  
1071 MS/MS-based lipidomics data. *Bioinformatics* 33, 1744–1746.
- 1072 Lupton, R.C., and Allwood, J.M. (2017). Hybrid Sankey diagrams: Visual analysis of  
1073 multidimensional data for understanding resource use. *Resour. Conserv. Recycl.* 124, 141–151.
- 1074 Martin, C.L., Montville, J.B., Steinfeldt, L.C., Omolewa-Tomobi, G., Heendeniya, K.Y., Adler,  
1075 M.E., and Moshfegh, A.J. (2012). USDA Food and Nutrient Database for Dietary Studies 2011--  
1076 2012: Documentation and User Guide. Beltsville, MD: US Department of Agriculture.  
1077 Agricultural Research Service, USDA Food Surveys Research Group.
- 1078 McDonald, D., Price, M.N., Goodrich, J., Nawrocki, E.P., DeSantis, T.Z., Probst, A., Andersen,  
1079 G.L., Knight, R., and Hugenholtz, P. (2012). An improved Greengenes taxonomy with explicit  
1080 ranks for ecological and evolutionary analyses of bacteria and archaea. *ISME J.* 6, 610–618.
- 1081 McDonald, D., Hyde, E., Debelius, J.W., Morton, J.T., Gonzalez, A., Ackermann, G., Aksenov,  
1082 A.A., Behsaz, B., Brennan, C., Chen, Y., et al. (2018). American Gut: an Open Platform for  
1083 Citizen Science Microbiome Research. *mSystems* 3.
- 1084 McKinney, W. (2010). Data Structures for Statistical Computing in Python. In Proceedings of the  
1085 9th Python in Science Conference, (SciPy), pp. 56–61.
- 1086 Ono, H., Ogasawara, O., Okubo, K., and Bono, H. (2017). RefEx, a reference gene expression  
1087 dataset as a web tool for the functional analysis of genes. *Sci Data* 4, 170105.
- 1088 Quinn, R.A., Nothias, L.-F., Vining, O., Meehan, M., Esquenazi, E., and Dorrestein, P.C. (2017).  
1089 Molecular Networking As a Drug Discovery, Drug Metabolism, and Precision Medicine Strategy.  
1090 *Trends Pharmacol. Sci.* 38, 143–154.
- 1091 Sawada, Y., Nakabayashi, R., Yamada, Y., Suzuki, M., Sato, M., Sakata, A., Akiyama, K.,  
1092 Sakurai, T., Matsuda, F., Aoki, T., et al. (2012). RIKEN tandem mass spectral database  
1093 (ReSpect) for phytochemicals: a plant-specific MS/MS-based data resource and database.  
1094 *Phytochemistry* 82, 38–45.
- 1095 Scheubert, K., Hufsky, F., Petras, D., Wang, M., Nothias, L.-F., Dührkop, K., Bandeira, N.,  
1096 Dorrestein, P.C., and Böcker, S. (2017). Significance estimation for large scale metabolomics  
1097 annotations by spectral matching. *Nat. Commun.* 8, 1494.
- 1098 Schmid, R., Petras, D., Nothias, L.-F., Wang, M., Aron, A.T., Jagels, A., Tsugawa, H., Rainer,  
1099 J., Garcia-Aloy, M., Dührkop, K., et al. (2020). Ion Identity Molecular Networking in the GNPS  
1100 Environment.
- 1101 Shannon, P., Markiel, A., Ozier, O., Baliga, N.S., Wang, J.T., Ramage, D., Amin, N.,  
1102 Schwikowski, B., and Ideker, T. (2003). Cytoscape: a software environment for integrated  
1103 models of biomolecular interaction networks. *Genome Res.* 13, 2498–2504.
- 1104 Sicherer, S.H., and Sampson, H.A. (2006). 9. Food allergy. *J. Allergy Clin. Immunol.* 117, S470–  
1105 S475.

- 1106 Song, S.J., Amir, A., Metcalf, J.L., Amato, K.R., Xu, Z.Z., Humphrey, G., and Knight, R. (2016).  
1107 Preservation Methods Differ in Fecal Microbiome Stability, Affecting Suitability for Field Studies.  
1108 *mSystems* 1.
- 1109 Sprecher, K.E., Ritchie, H.K., Burke, T.M., Depner, C.M., Smits, A.N., Dorrestein, P.C.,  
1110 Fleshner, M., Knight, R., Lowry, C.A., Turek, F.W., et al. (2019). Trait-like vulnerability of higher-  
1111 order cognition and ability to maintain wakefulness during combined sleep restriction and  
1112 circadian misalignment. *Sleep* 42.
- 1113 Sumner, L.W., Amberg, A., Barrett, D., Beale, M.H., Beger, R., Daykin, C.A., Fan, T.W.-M.,  
1114 Fiehn, O., Goodacre, R., Griffin, J.L., et al. (2007). Proposed minimum reporting standards for  
1115 chemical analysis Chemical Analysis Working Group (CAWG) Metabolomics Standards  
1116 Initiative (MSI). *Metabolomics* 3, 211–221.
- 1117 Taylor, B.C., Lejzerowicz, F., Poirel, M., Shaffer, J.P., Jiang, L., Aksenov, A., Litwin, N.,  
1118 Humphrey, G., Martino, C., Miller-Montgomery, S., et al. (2020). Consumption of Fermented  
1119 Foods Is Associated with Systematic Differences in the Gut Microbiome and Metabolome.  
1120 *mSystems* 5.
- 1121 Thompson, L.R., Sanders, J.G., McDonald, D., Amir, A., Ladau, J., Locey, K.J., Prill, R.J.,  
1122 Tripathi, A., Gibbons, S.M., Ackermann, G., et al. (2017). A communal catalogue reveals Earth's  
1123 multiscale microbial diversity. *Nature* 551, 457–463.
- 1124 Vinaixa, M., Schymanski, E.L., Neumann, S., Navarro, M., Salek, R.M., and Yanes, O. (2016).  
1125 Mass spectral databases for LC/MS- and GC/MS-based metabolomics: State of the field and  
1126 future prospects. *Trends Analyt. Chem.* 78, 23–35.
- 1127 van der Walt, S., Colbert, S.C., and Varoquaux, G. (2011). The NumPy Array: A Structure for  
1128 Efficient Numerical Computation. *Computing in Science Engineering* 13, 22–30.
- 1129 Wang, M., Carver, J.J., Phelan, V.V., Sanchez, L.M., Garg, N., Peng, Y., Nguyen, D.D.,  
1130 Watrous, J., Kapon, C.A., Luzzatto-Knaan, T., et al. (2016). Sharing and community curation of  
1131 mass spectrometry data with Global Natural Products Social Molecular Networking. *Nat.*  
1132 *Biotechnol.* 34, 828–837.
- 1133 Watrous, J., Roach, P., Alexandrov, T., Heath, B.S., Yang, J.Y., Kersten, R.D., van der Voort,  
1134 M., Pogliano, K., Gross, H., Raaijmakers, J.M., et al. (2012). Mass spectral molecular  
1135 networking of living microbial colonies. *Proc. Natl. Acad. Sci. U. S. A.* 109, E1743–E1752.
- 1136 Wishart, D.S., Feunang, Y.D., Marcu, A., Guo, A.C., Liang, K., Vázquez-Fresno, R., Sajed, T.,  
1137 Johnson, D., Li, C., Karu, N., et al. (2018). HMDB 4.0: the human metabolome database for  
1138 2018. *Nucleic Acids Res.* 46, D608–D617.
- 1139
